# Supplementary material
Source: PubMed Central journal article supplement (PMC5224972)
Supplement: NIHMS825713-supplement.pdf [file NIHMS825713-supplement.pdf]

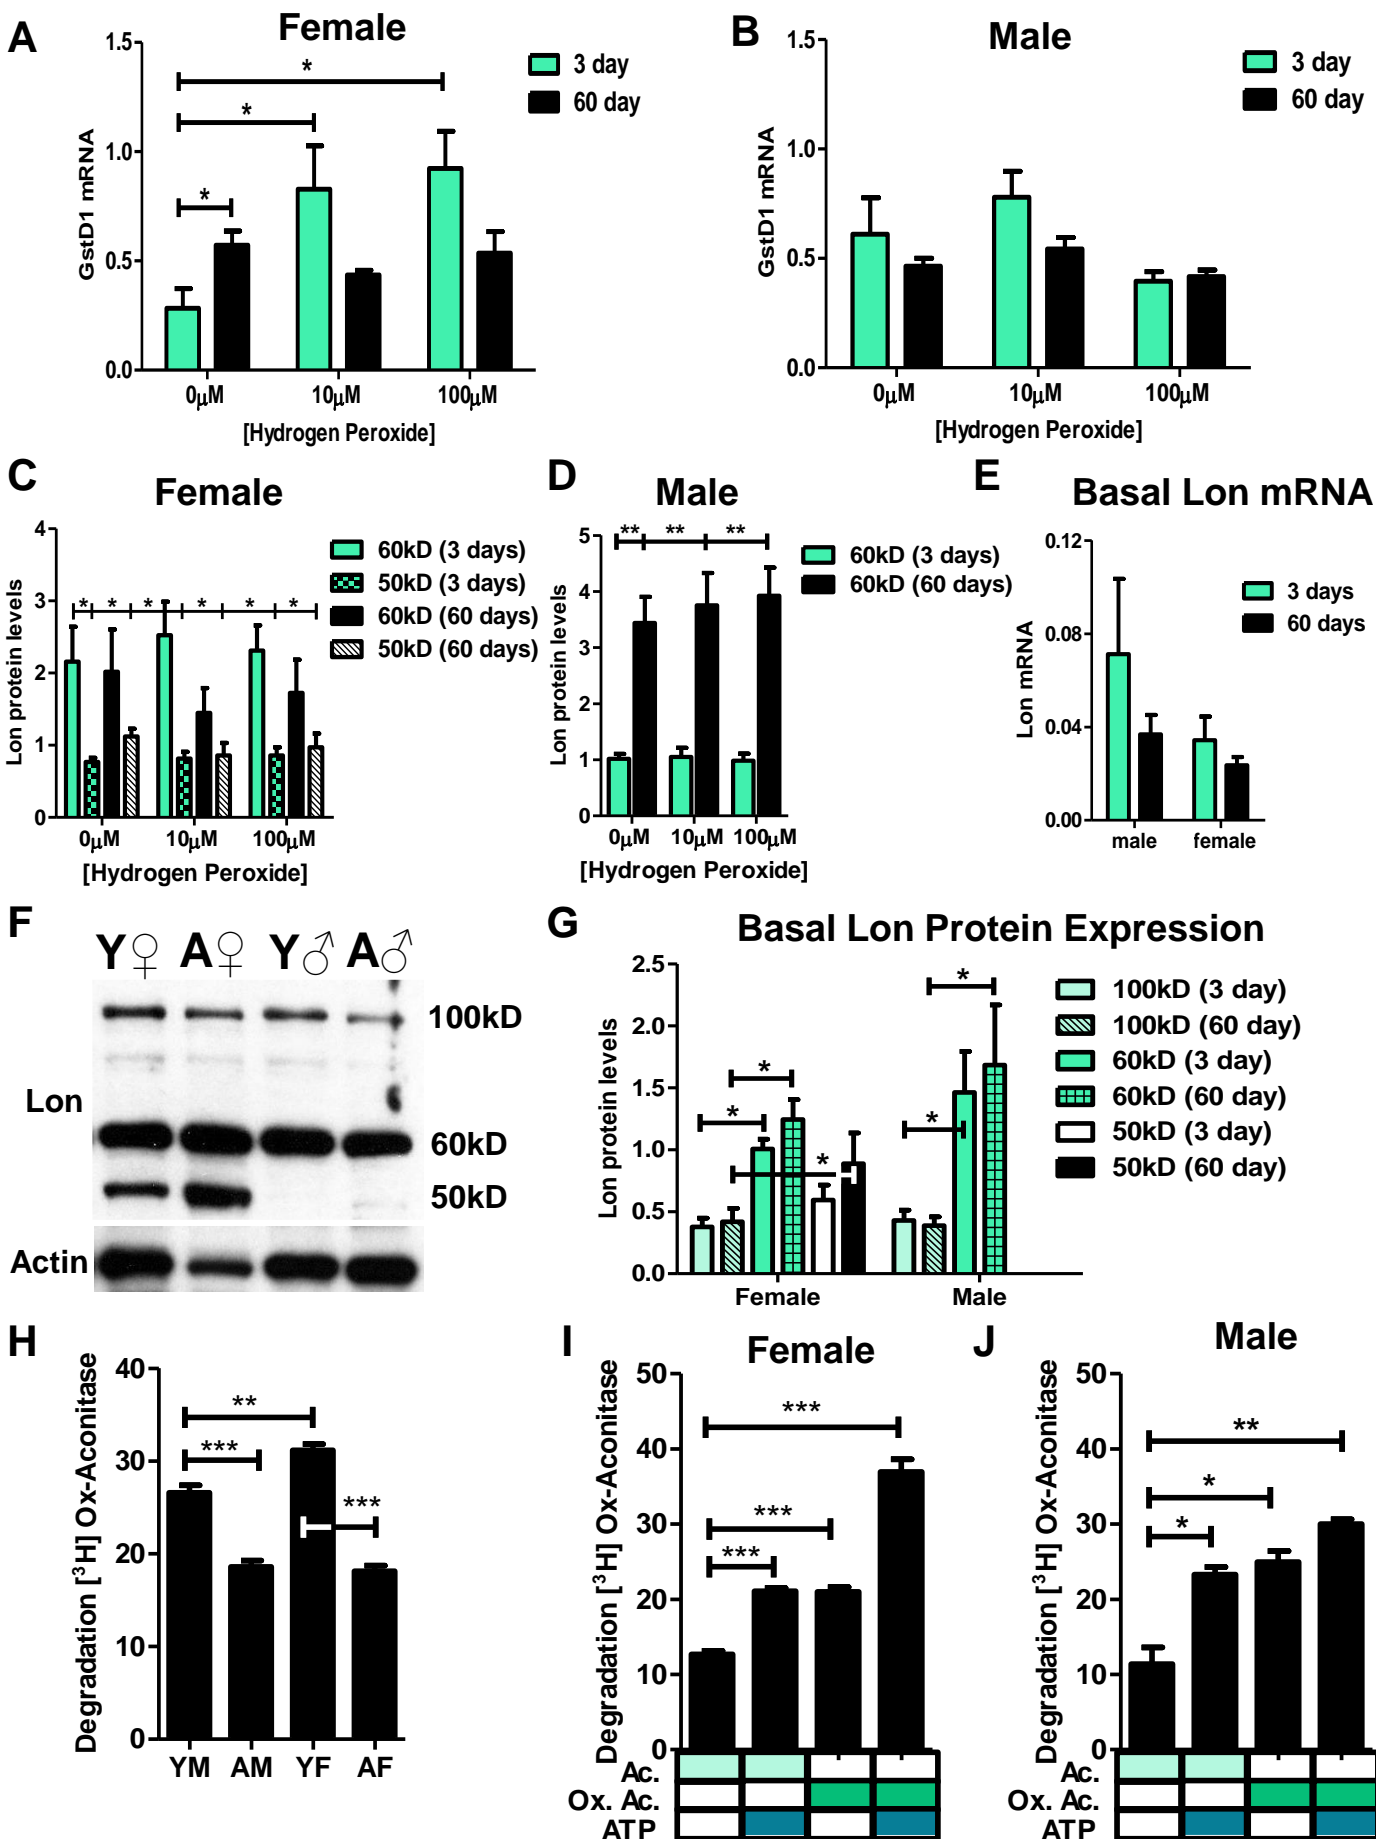

**Figure S1, Relates to Figures 1 & 2. Age-related Changes Following Hydrogen Peroxide Pre-treatment.**

(A,B) Glutathione S-transferase D1 (GstD1) mRNA levels were compared between 3 day and 60 day old w[1118] x Actin-GS-255B females and males following hydrogen peroxide pretreatment. (A) Females. (B) Males. Statistical significance was calculated using one-way ANOVA, with statistically significant differences ( $p < 0.05$ ) indicated with asterisk. (C) Quantification of Lon protein bands (60kD and 50kD) following hydrogen peroxide pretreatment in 3 day old and 60 day old females. (D) Quantification of 60kD bands in 3 day old and 60 day old males pretreated with hydrogen peroxide. (E) Basal levels of *lon* mRNA were compared between 3 day and 60 day old w[1118] x Actin-GS-255B males and females. (F) Basal protein expression of Lon was compared between 3 day and 60 day old w[1118] x Actin-GS-255B males and females, protein content was normalized to anti-Actin-HRP antibody. (G) Quantification of Lon bands (100kD, 60kD, and 50kD) in 3 day (Y♀) and 60 day (A♀) females, and 3 day males (Y♂), and 60 day males (A♂) using ImageJ. (H) Basal activity was measured in mitochondria isolated from 3 day or 60 day old w[1118] x Actin-GS-255B females and males. (I,J) Basal activity was measured in mitochondria isolated from 3 day old w[1118] x Actin-GS-255B females and males, using the substrate [<sup>3</sup>H] aconitase (Ac.) or oxidized [<sup>3</sup>H] aconitase (Ox Ac.), in the absence or presence of 5mM ATP. (I) Females. (J) Males. Statistical significance was calculated using one-way ANOVA, with statistically significant difference (\* $p < 0.05$ , \*\* $p < 0.01$ , \*\*\* $p < 0.001$ ) indicated with asterisk.

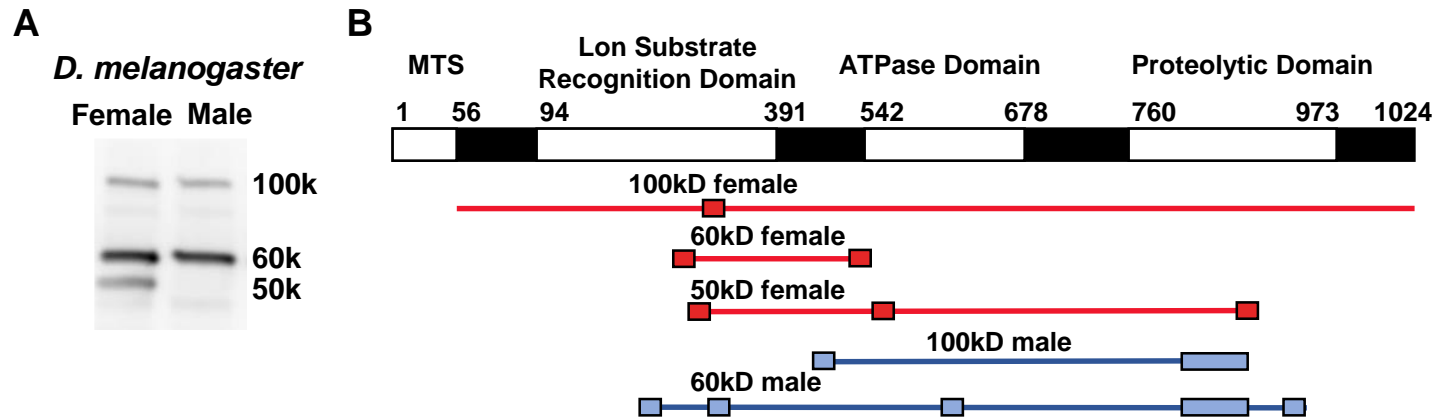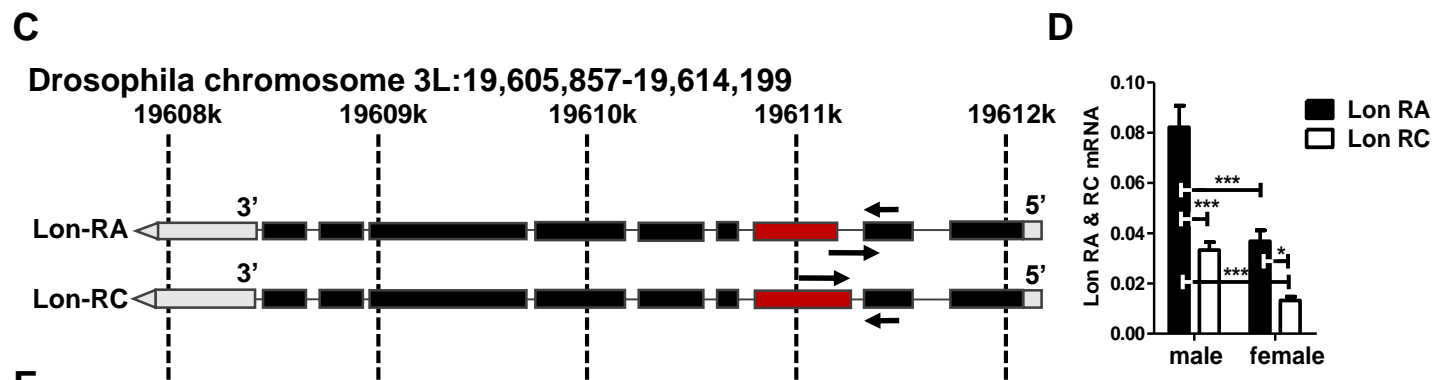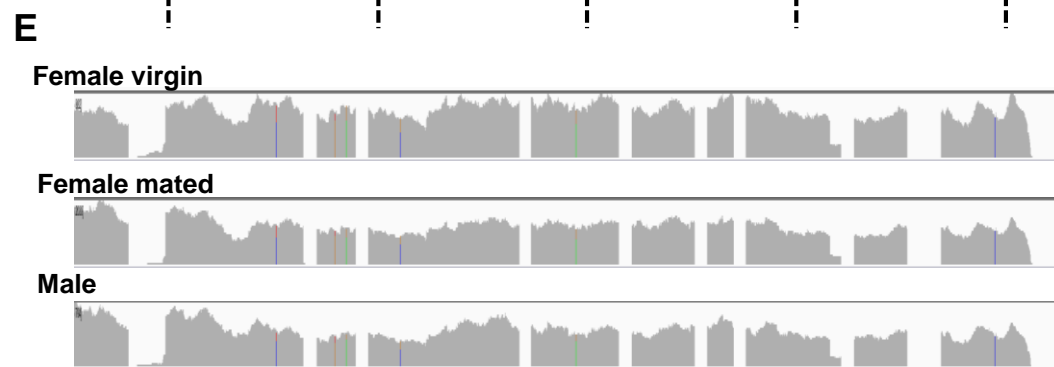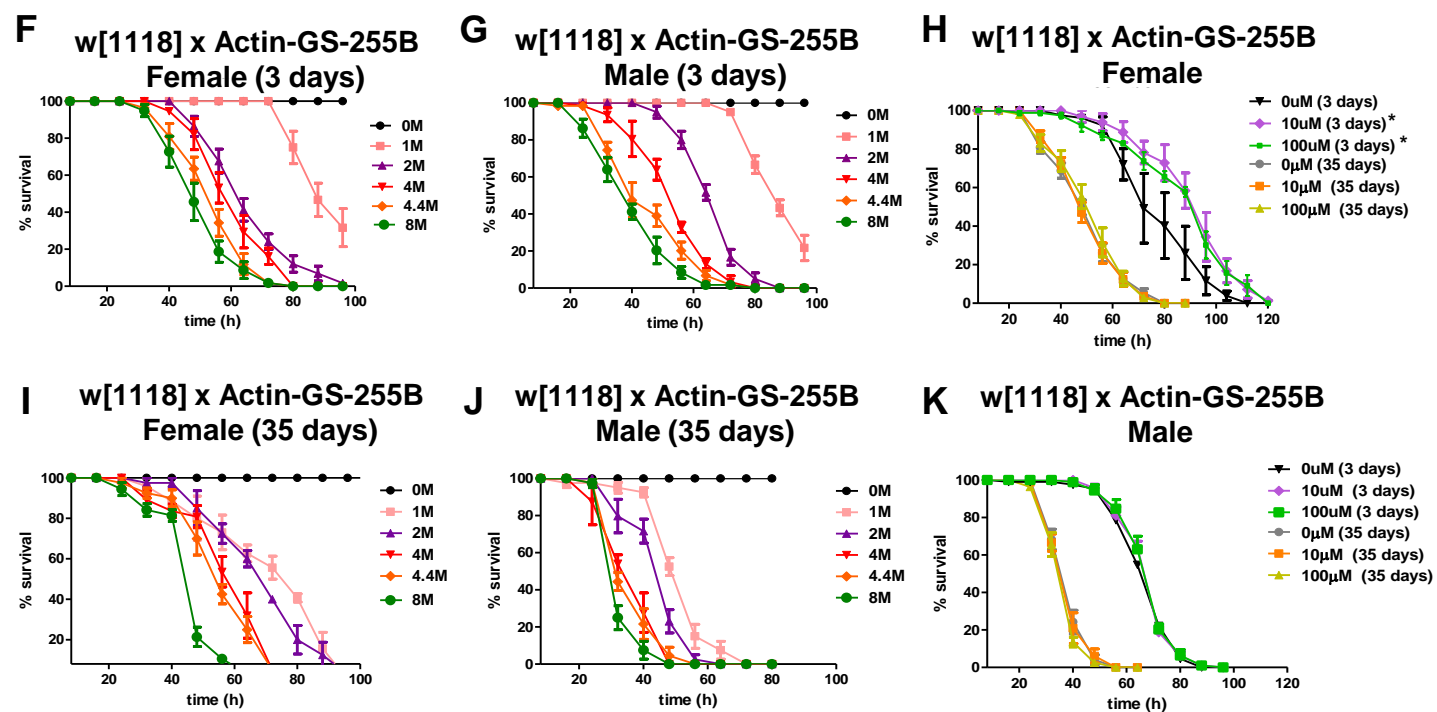

**Figure S2, Relates to Figures 1, 2 & 5. Sex-dependent Variation of Lon Expression with Equal Sex Sensitivity to Hydrogen Peroxide, But Only Females Adapt.**

(A) Western blot of w[1118] x Actin-GS-255B females and males probed with the polyclonal anti-Lon antibody. The sex-specific bands are marked at the corresponding molecular weights. (B) Depiction of the domains of *D. melanogaster* Lon. The colored boxes indicate the detected peptide fragments, pink corresponding to those found in females and blue indicating those found in males. The lines indicate the expected peptide length. (C) Diagram of known *D. melanogaster* Lon-RA and Lon-RC intronic and exonic transcript regions (FlyBase gene consortium). Black arrows indicate primers unique for each isoform. (D) Transcript levels of Lon RA and Lon RC in 3 day old w[1118] x Actin-GS-255B males and females measured by qPCR. (E) Exonic regions (gray) and intronic regions (white) of the total Lon transcript detected from RNA sequencing from 12 day old virgin females, mated females, and males. Statistical significance was calculated using one-way ANOVA, with statistically significant difference (\* $p < 0.05$ , \*\* $p < 0.01$ , \*\*\* $p < 0.001$ ) indicated with asterisk. (F,G,I,J) Survival curves for w[1118] x Actin-GS-255B (control cross) exposed to increasing hydrogen peroxide concentrations. (F) 3 day old females. (G) 3 day old males. (I) 35 day old females. (J) 35 day old males. (H,K) Survival curves for control flies fed various adaptive doses of hydrogen peroxide [0 $\mu$ M-100 $\mu$ M] prior to exposure to challenge dose [4.4M]. (H) Females. (K) Males. Statistically significant difference in survival relative to control ( $p < 0.05$ ) was calculated using the Log-Rank test, and is indicated by asterisk. Statistical summary is located in Table S1.

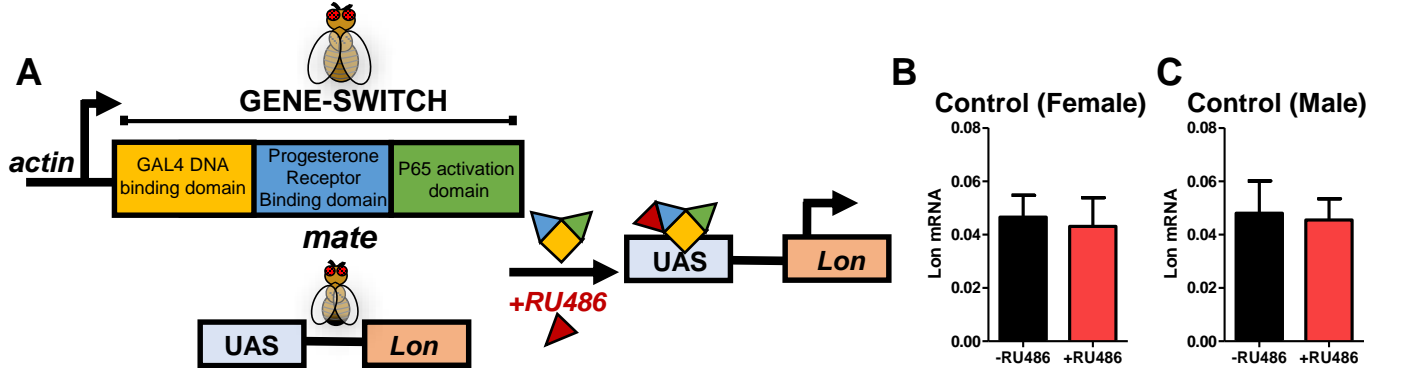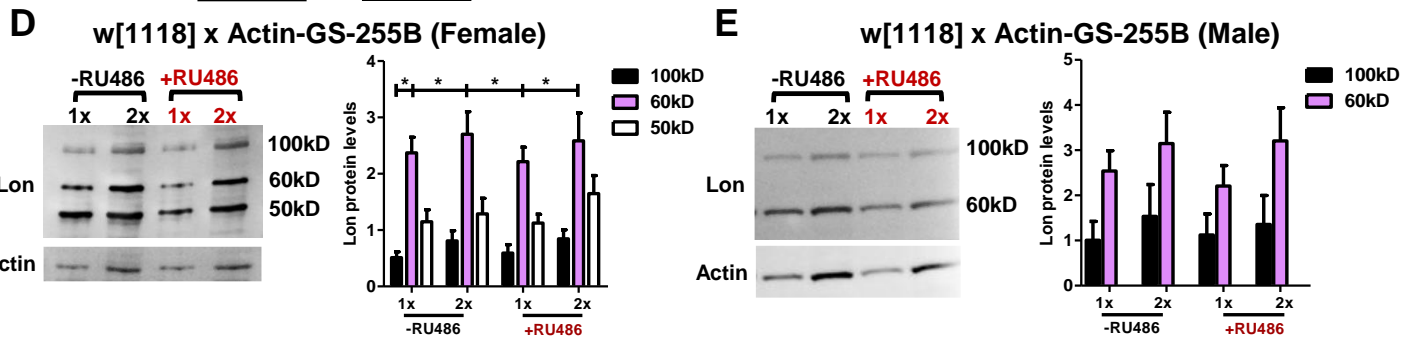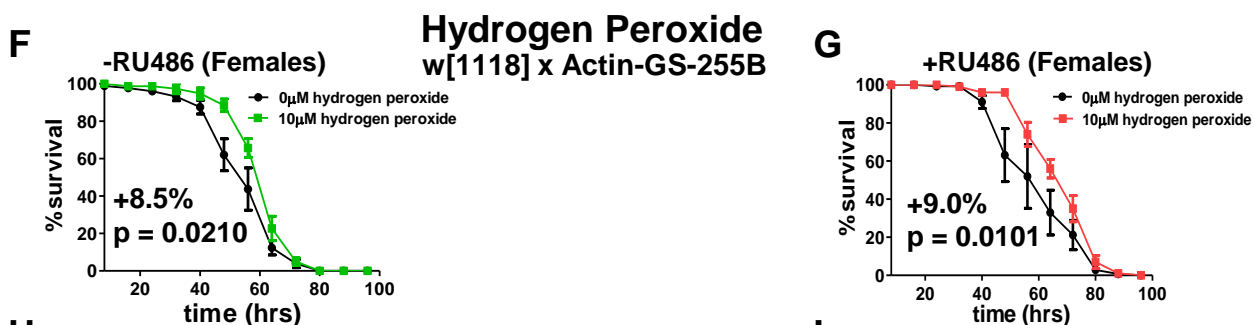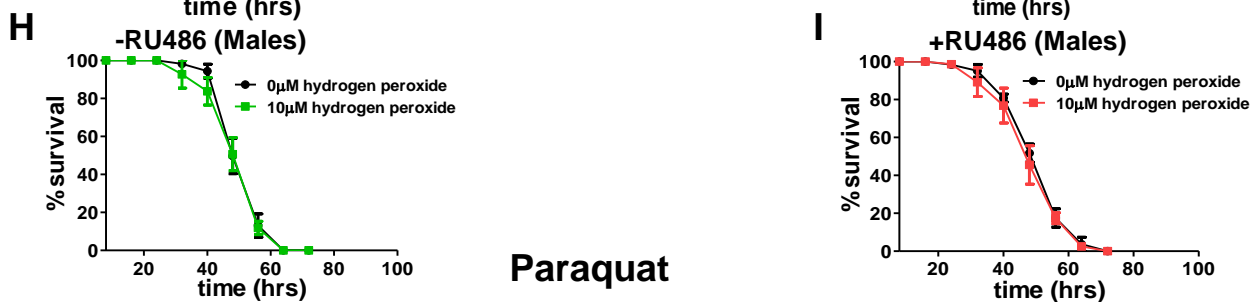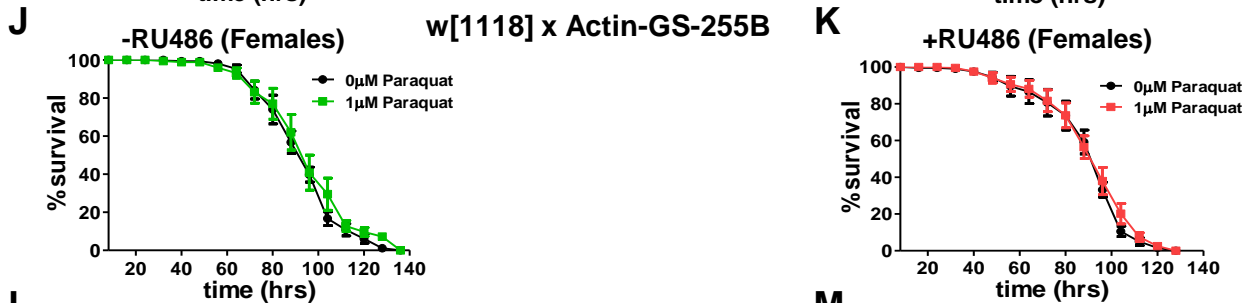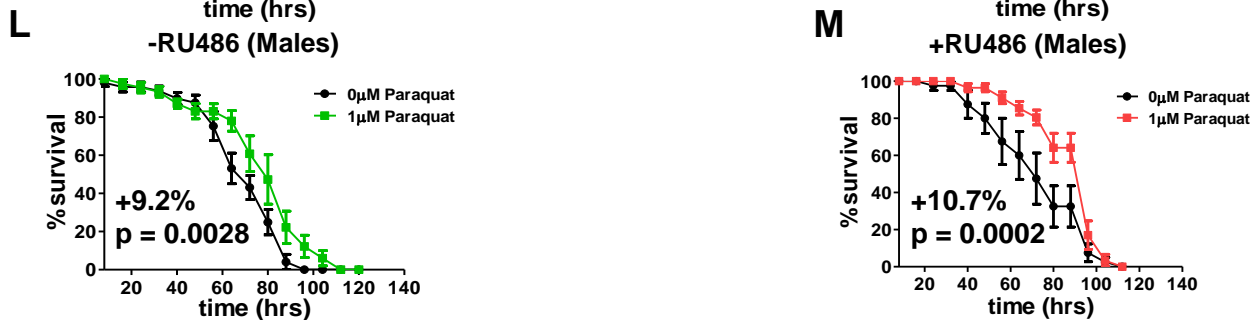

**Figure S3, Relates to Figure 2 & 5. RU486 Does Not Impact Lon Expression or Sex-specific Adaptation**

(A) Diagram of the *Drosophila* Gene-Switch system. Females of the Actin-'Gene-Switch'-255B (Actin-GS-255B) driver strain are mated to males containing the target gene. Upon the addition of RU486, it binds to the progesterone receptor domain, causing the GAL4 DNA binding domain to interact with the upstream activation site to modulate the expression of the target gene. (B,C) The Actin-GS-255B strain was crossed to w[1118] control strain. Progeny were fed  $\pm$ RU486 for 10 days prior to mRNA isolation. Transcript levels of *lon* mRNA in  $\pm$ RU486 controls (B) Females. (C) Males. (D,E) Western blot of 10 day old w[1118] x 255B (control) flies were run on a 10% gel at a concentration of 5 $\mu$ g (1x) or 10 $\mu$ g (2x), with the molecular weights of the Lon bands marked. (D) Females. (E) Males. Protein content was normalized to anti-HRP-actin antibody and quantified using ImageJ. Statistical significance was calculated using one-way ANOVA, with statistically significant difference ( $p < 0.05$ ) indicated with asterisk and compared to the 1x -RU486 control. (F-M) Adaptation curves for progeny of the w[1118] x Actin-GS-255B cross. (F,H,J,L) Progeny fed ethanol or (G,I,K,M) RU486 for 9 days prior to pretreatment. (F,G) Female pretreated with hydrogen peroxide. (H,I) Males pretreated with hydrogen peroxide. (J,K) Females pretreated with paraquat. (L,M) Males pretreated with paraquat. Statistical difference in survival ( $p < 0.05$ ) was calculated using the Log-Rank test. The p-value and percent change of the median is indicated. Statistical Summary is located in Table S2.

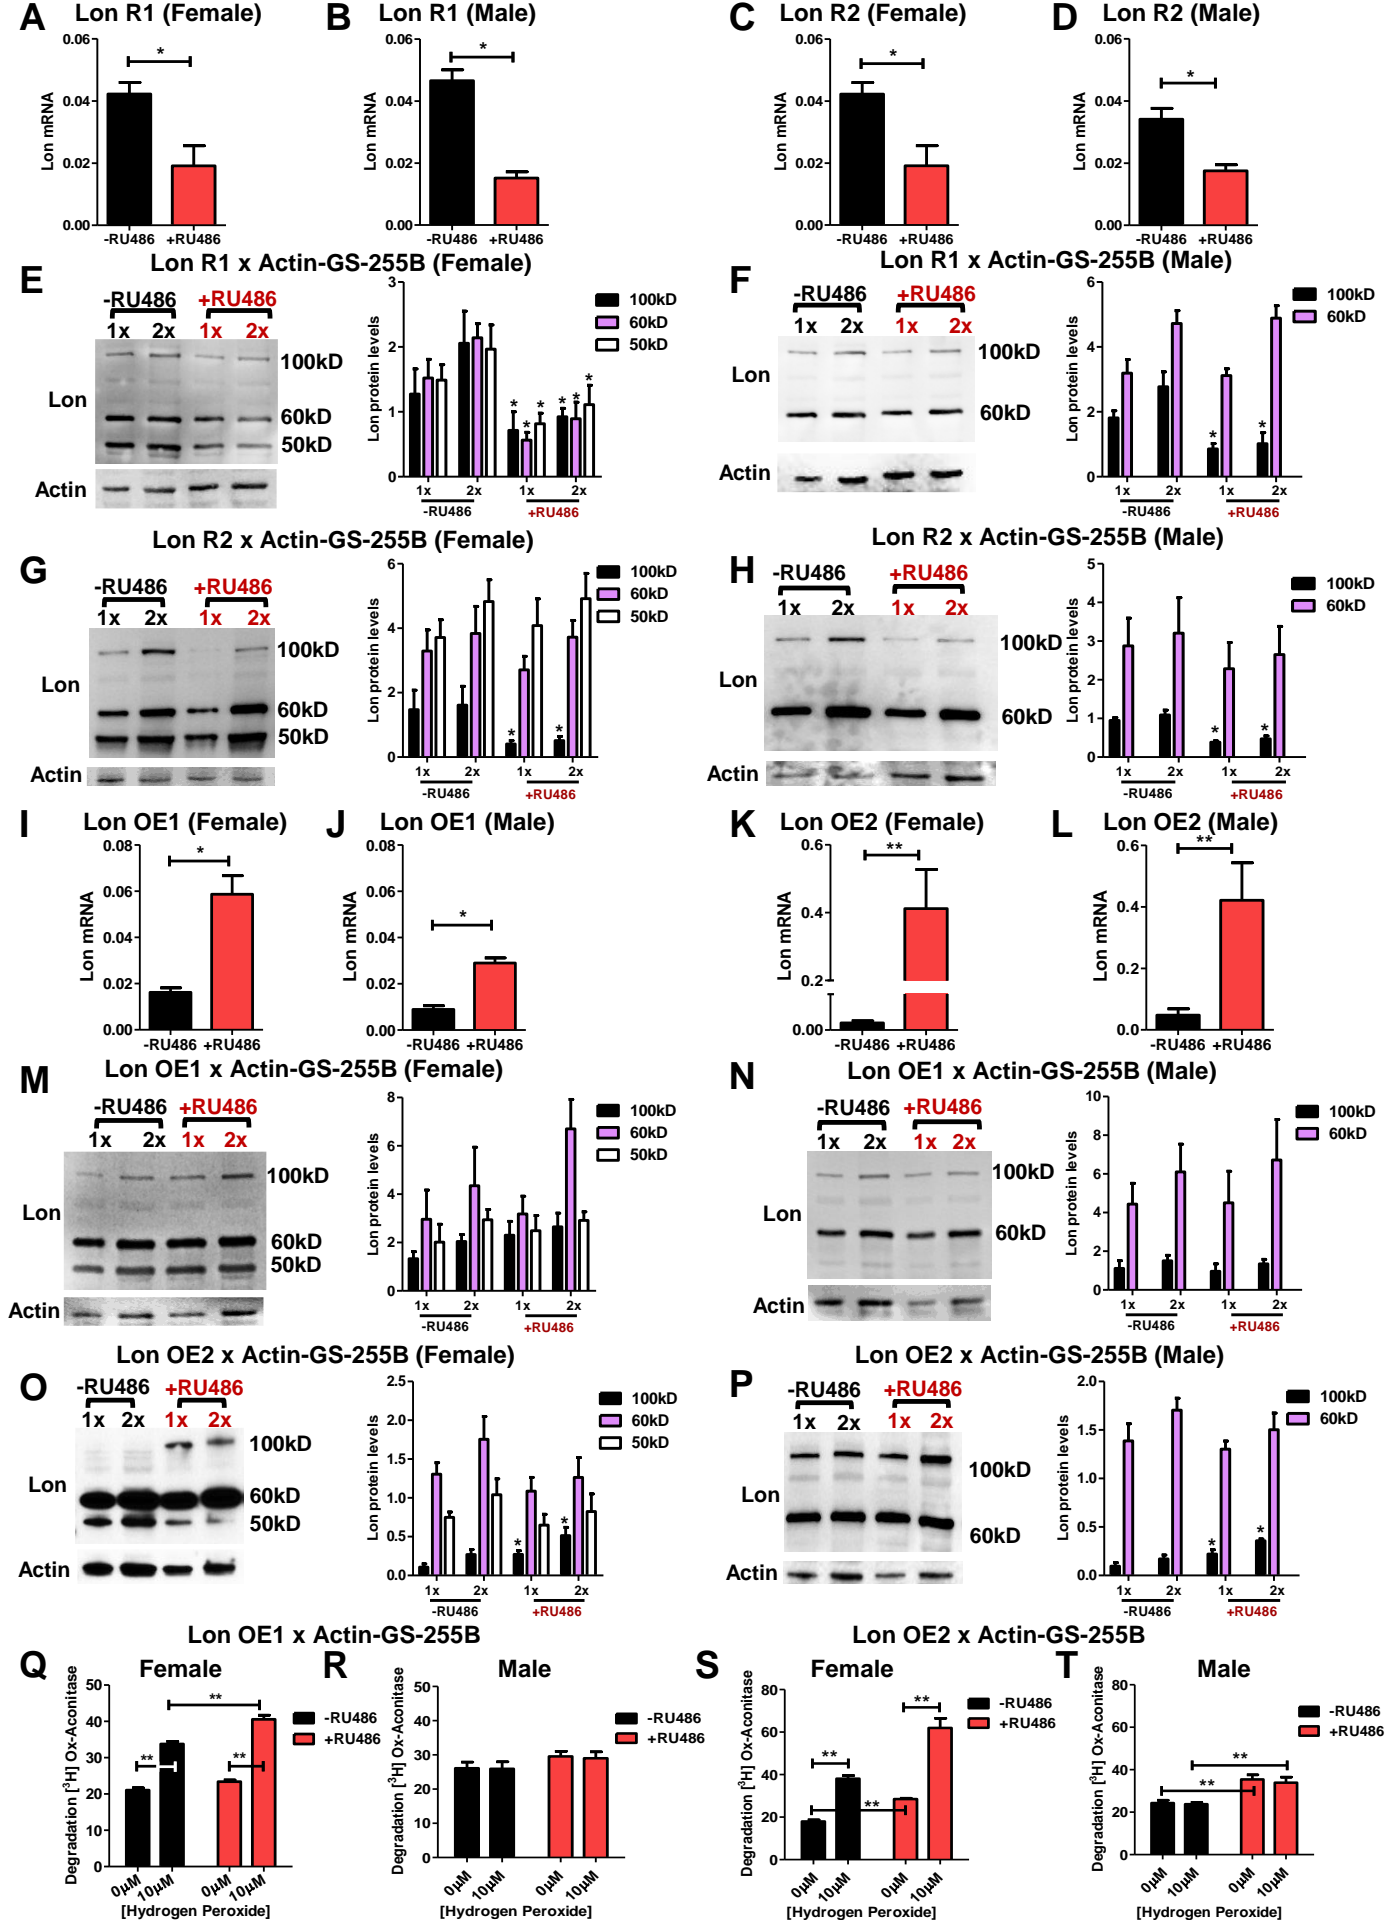

**Figure S4, Relates to Figure 2 & 5. Modulation of Lon expression Using the Gene-Switch System**

(A-T) Flies were fed  $\pm$ RU486 for 10 days before assays were performed. The Lon transcript amount of RU486 fed Lon R1 and R2 (RNAi strains) were assessed to determine efficiency of the Gene-Switch system (A,C) Females. (B,D) Males. (E,F) Western blot of 10 day old Lon R1 RNAi flies run on a 10% gel at a concentration of 5 $\mu$ g (1x) or 10 $\mu$ g (2x). (E) Females showed banding of Lon marked at 100kD, 60kD, and 50kD. (F) Males showed Lon banding marked at 100kD and 60kD. Blots were normalized to anti-HRP-actin antibody. (G,H) Western blot of 10 day old Lon R2 RNAi flies. (G) Females showed three Lon bands marked at 100kD, 60kD, and 50kD. (H) Males showed two Lon bands at 100kD and 60kD. (I-L) Transcript levels of *lon* mRNA in Lon OE1 and OE2 flies (Lon Over-expression strains). (I,K) Females. (J,L) Males. (M,N) Western blot of 10 day old Lon OE1 Over-expression flies run on a 10% gel with Lon bands indicated. (M) Females. (N) Males. (O,P) Western blot of 10 day old Lon OE2 Over-expression flies. (O) Females showed three Lon bands at 100kD, 60kD, and 50kD. (P) Males showed two Lon bands at 100kD and 60kD. (Q-T) Proteolytic capacity in isolated mitochondria from flies of the Lon OE1 and OE2 strains, pretreated with hydrogen peroxide (Q) Lon OE1 females (R) Lon OE1 males (S) Lon OE2 females (T) Lon OE2 males. Protein was quantified using ImageJ. Statistical significance was calculated using one-way ANOVA, with statistically significant difference ( $p < 0.05$ ) indicated with asterisk.



**FEMALE**

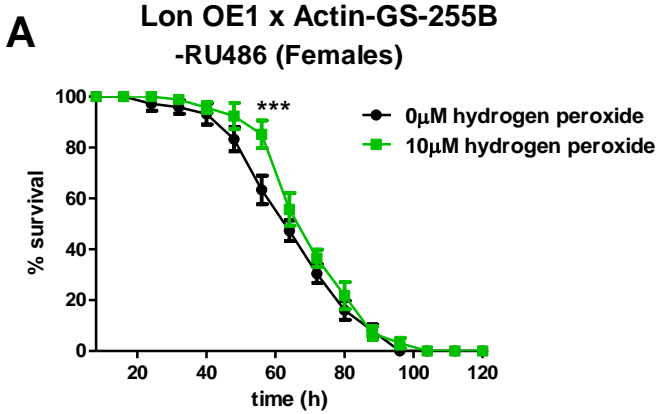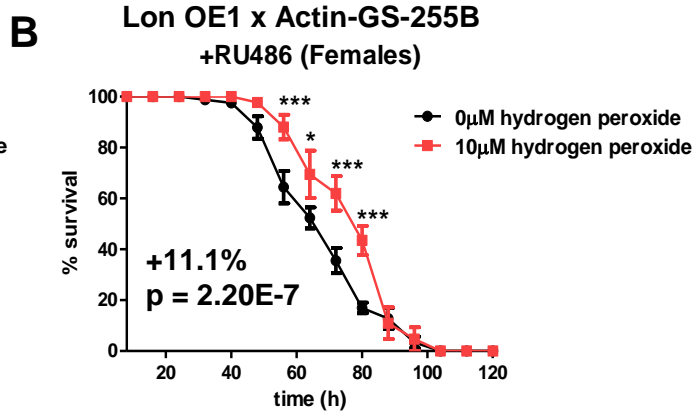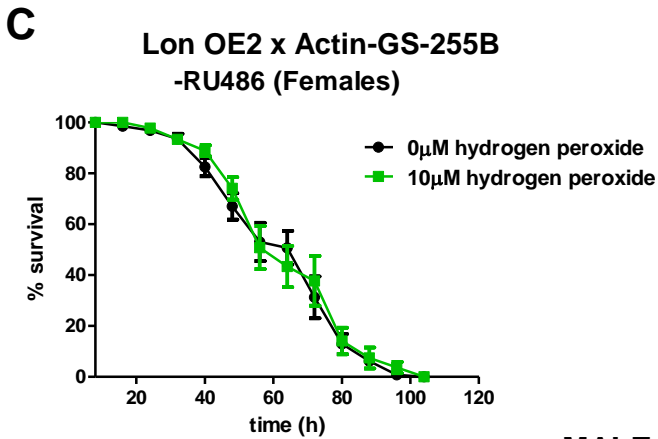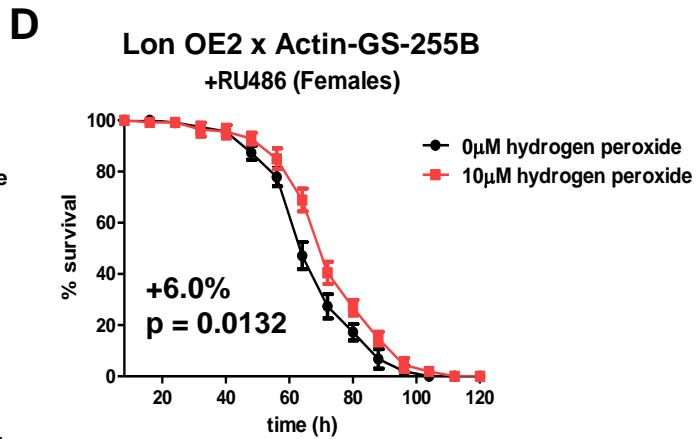

**MALE**

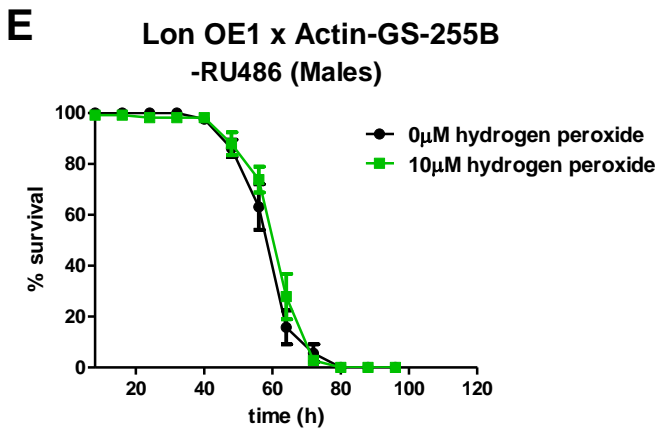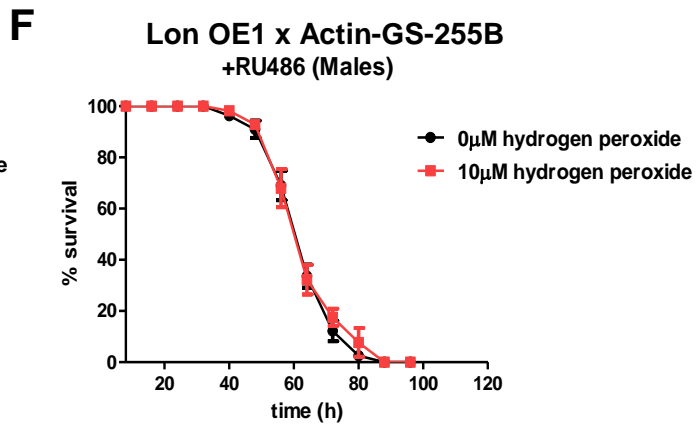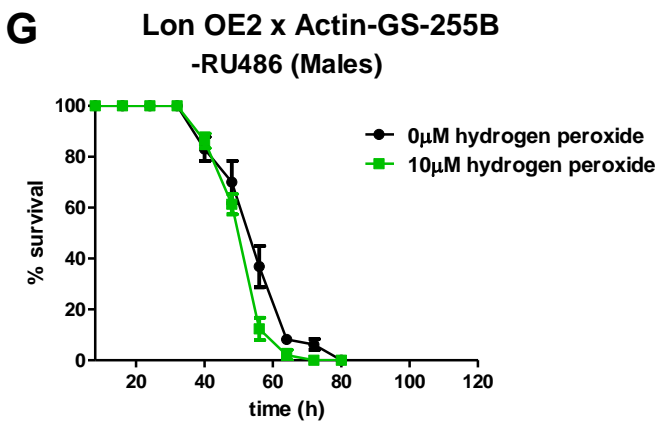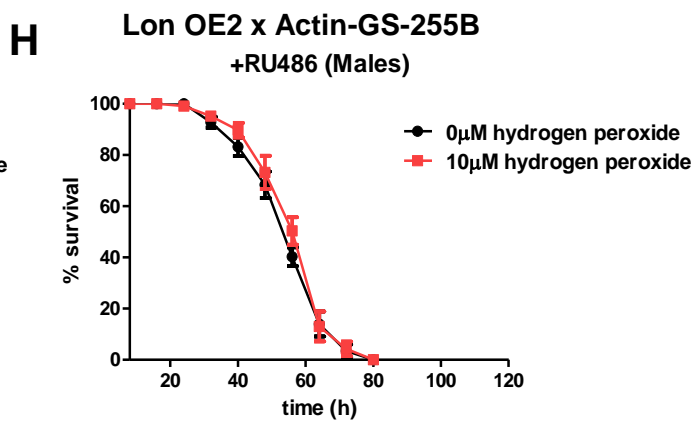

**Figure S5, Relates to Figure 2. Over-expression of Lon is Beneficial to Hydrogen Peroxide Adaptation in a Female-specific Manner**

Over-expression of Lon was generated by the Gene-Switch system. The Actin-GS-255B strain was crossed to two different Lon OE strains (Lon OE1 and Lon OE2). In all cases flies were cultured on either ethanol (vehicle) or mifepristone (RU486) for 9 days prior to pre-treatment with hydrogen peroxide. (A, C) Females cultured in the absence of RU486. (B, D) Females cultured in the presence of RU486. (E, G) Males cultured in the absence of RU486. (F, H) Males cultured in the presence of RU486. Statistical difference in survival ( $p < 0.05$ ) was calculated using the Log-Rank test. The p-value and percent change of the median is indicated. Asterisks indicate two-sided t-test comparison that showed statistically significant differences ( $p < 0.05$ ) at individual time points. Statistical Summary is located in Table S4.

**A** w[1118] x Actin-GS-255B  
Female

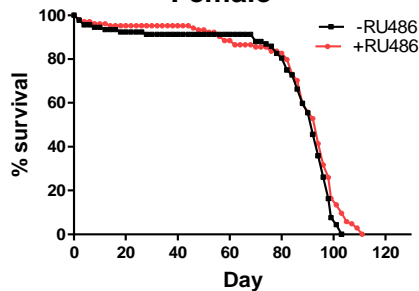

**B** w[1118] x Actin-GS-255B  
Male

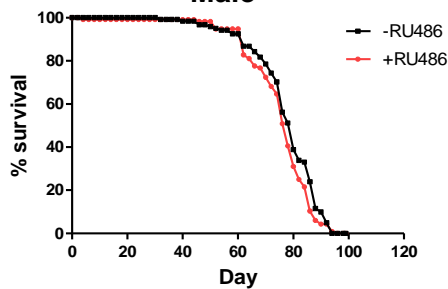

**C** Lon R1 x Actin-GS-255B  
Female

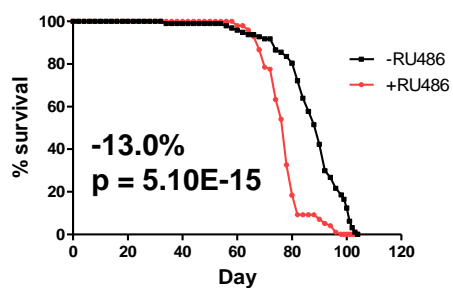

**D** Lon R1 x Actin-GS-255B  
Male

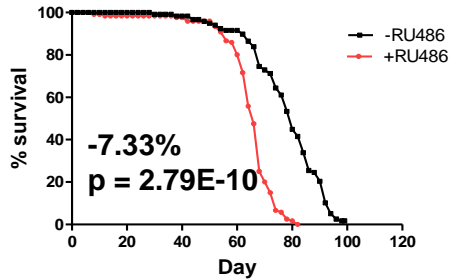

**E** Lon R2 x Actin-GS-255B  
Female

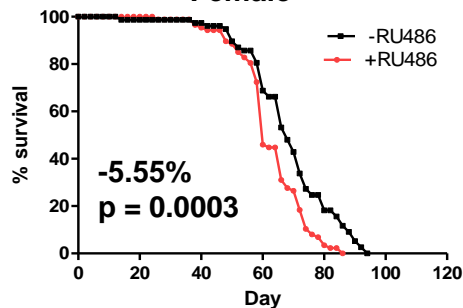

**F** Lon R2 x Actin-GS-255B  
Male

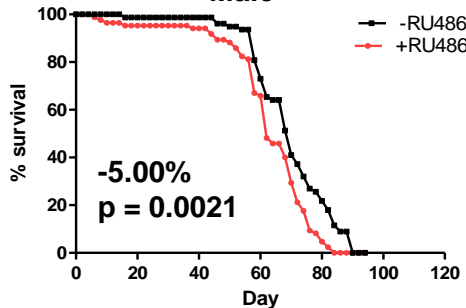

**G** Lon OE2 x Actin-GS-255B  
Female

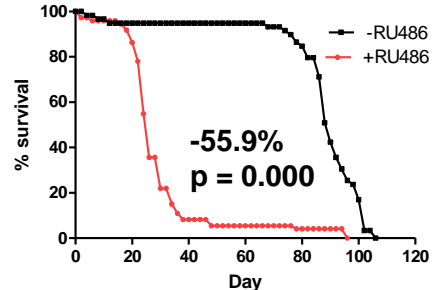

**H** Lon OE2 x Actin-GS-255B  
Male

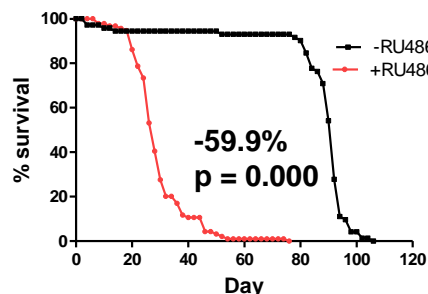

**I** Lon OE1 x Actin-GS-255B  
Female

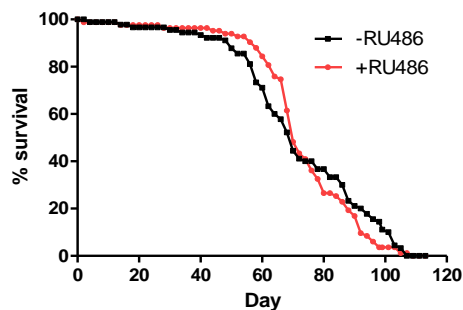

**J** Lon OE1 x Actin-GS-255B  
Male

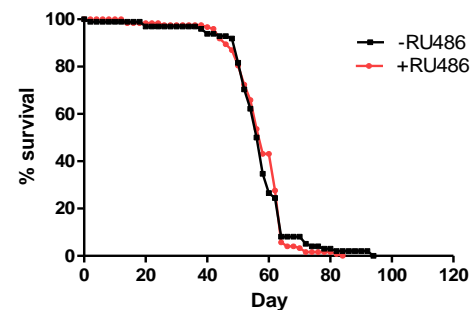

**Figure S6, Relates to Figures 2 & 5. Constitutive Over-expression or RNAi Knockdown of Lon is Detrimental to Lifespan**

(A,B) Controls for effect of RU486 drug on males and females. The Actin-GS-255B strain was crossed to w[1118] control strain and the progeny were assayed for life span in the presence and absence of RU486, as indicated. (A) Females. (B) Males. (C-F) Effect of Lon RNAi on life span. The Actin-GS-255B strain was crossed to Lon R1 RNAi or Lon R2 RNAi and the progeny were assayed for life span in presence and absence of RU486, as indicated. (C) Lon R1 Females. (D) Lon R1 Males. (E) Lon R2 Females. (F) Lon R2 Males. (G-J) Effect of Lon Over-expression on life span. The Actin-GS-255B strain was crossed to Lon OE2 or Lon OE1 Over-expression and the progeny were assayed for life span in presence and absence of RU486, as indicated (G) Lon OE2 Females. (H) Lon OE2 Males. (I) Lon OE1 Females. (J) Lon OE1 Males. Statistical difference in survival ( $p < 0.05$ ) was calculated using the Log-Rank test. The p-value and percent change of the median is indicated. Statistical Summary is located in Table S6.



**Figure S7, Relates to Figures 6 & 7. *TraF* Transformation Using the Gene-Switch System**

(A) Western blot of male and female progeny of *w*[1118] x Actin-GS-255B, raised in the absence (-RU486) or presence of various concentrations of RU486: 160µg/mL (1x RU486), 320µg/mL (2x RU486), and 640µg/mL (4x RU486). The increasing concentrations of RU486 does not impact male or female Lon specific banding patterns. (B-C). Progeny from the *TraF* x Actin-GS-255B cultured on either ethanol (-RU486) or 320µg/mL mifepristone (+RU486) throughout development. Western blots of flies' pretreated with (B) hydrogen peroxide [0µM-10µM] (C) paraquat [0µM-1µM]. (D) Adult progeny of the *TraF* x Actin-GS-255B were fed ±RU486 for 9 days prior to hydrogen peroxide [0µM-10µM] pretreatment. (E) Progeny of the *Tra* RNAi x Actin-GS-255B were cultured on ±RU486 throughout development prior to hydrogen peroxide [0µM-10µM] pretreatment. The concentration of pretreatment and the presence of RU486 is indicated with "+" above blots. Western blots were performed in triplicate and protein content was normalized to anti-Actin-HRP antibody. Quantification of Lon bands (100kD, 60kD, and 50kD) was completed using ImageJ and indicated in bar graphs. Statistical significance was calculated using one-way ANOVA, with statistically significant difference (\* $p < 0.05$ , \*\* $p < 0.01$ ) indicated with asterisk. (F,G) Hydrogen peroxide [4.4M] challenge dose comparison in female and male progeny from *w*[1118] x Actin-GS-255B cultured on either ethanol (-RU486) or 320µg/mL mifepristone (+RU486) to demonstrate no drug affect. (H,I) Progeny of *TraF* x Actin-GS-255B exposed to hydrogen peroxide [4.4M] challenge dose to show no survival difference. (J,K) Paraquat [30mM] challenge dose in female and male progeny from the *w*[1118] x Actin-GS-255B, show no drug effect. (L,M) Progeny of the *TraF* x Actin-GS-255B exposed to paraquat [30mM] challenge dose, show no drug effect.

**Table S1, Relates to Figure 3 and S2. Hydrogen Peroxide and Paraquat Adaptation Statistical Summary**

| Genotype                                      | Sex | [H <sub>2</sub> O <sub>2</sub> ] | N   | Mean(SD) | Median | 90% | Δ Mean % | Δ Median % | (p)      |
|-----------------------------------------------|-----|----------------------------------|-----|----------|--------|-----|----------|------------|----------|
| <b>Control Strain (Hydrogen Peroxide)</b>     |     |                                  |     |          |        |     |          |            |          |
| w[1118] x Actin-GS-255B<br>Cohort 1 (3 days)  | F   | 0μM                              | 54  | 92 (16)  | 96     | 112 |          |            |          |
|                                               |     | 10μM                             | 56  | 101 (16) | 104    | 120 | 8.17     | 7.70       | 6.94E-12 |
|                                               |     | 100μM                            | 59  | 97 (19)  | 104    | 120 | 4.98     | 7.70       | 2.57E-08 |
| w[1118] x Actin-GS-255B<br>Cohort 2 (3 days)  | F   | 0μM                              | 59  | 77 (16)  | 80     | 96  |          |            |          |
|                                               |     | 10μM                             | 57  | 85 (17)  | 88     | 104 | 9.71     | 9.10       | 1.96E-11 |
|                                               |     | 100μM                            | 60  | 82 (19)  | 88     | 104 | 6.13     | 9.10       | 2.10E-08 |
| w[1118] x Actin-GS-255B<br>Cohort 1 (3 days)  | M   | 0μM                              | 59  | 80 (13)  | 80     | 96  |          |            |          |
|                                               |     | 10μM                             | 57  | 81 (12)  | 80     | 96  | 1.33     | 0.00       | 0.6360   |
|                                               |     | 100μM                            | 59  | 81 (12)  | 80     | 96  | 1.38     | 0.00       | 0.5971   |
| w[1118] x Actin-GS-255B<br>Cohort 2 (3 days)  | M   | 0μM                              | 58  | 72 (13)  | 72     | 80  |          |            |          |
|                                               |     | 10μM                             | 59  | 73 (12)  | 72     | 80  | 1.31     | 0.00       | 0.6216   |
|                                               |     | 100μM                            | 56  | 73 (13)  | 72     | 80  | 1.22     | 0.00       | 0.4878   |
| w[1118] x Actin-GS-255B<br>Cohort 1 (35 days) | F   | 0μM                              | 121 | 51 (14)  | 55     | 65  |          |            |          |
|                                               |     | 10μM                             | 98  | 53 (16)  | 55     | 70  | 0.77     | 0.00       | 0.6348   |
|                                               |     | 100μM                            | 103 | 53 (15)  | 55     | 70  | 1.83     | 0.00       | 0.3828   |
| w[1118] x Actin-GS-255B<br>Cohort 2 (35 days) | F   | 0μM                              | 110 | 50(16)   | 54     | 67  |          |            |          |
|                                               |     | 10μM                             | 101 | 51 (15)  | 54     | 67  | 0.68     | 0.00       | 0.7747   |
|                                               |     | 100μM                            | 99  | 50 (15)  | 54     | 67  | 0.25     | 0.00       | 0.9695   |
| w[1118] x Actin-GS-255B<br>Cohort 1 (35 days) | M   | 0μM                              | 120 | 37 (10)  | 42     | 50  |          |            |          |
|                                               |     | 10μM                             | 100 | 36 (9.8) | 40     | 50  | -0.65    | -1.09      | 0.5561   |
|                                               |     | 100μM                            | 100 | 37 (10)  | 42     | 50  | 0.35     | 0.00       | 0.8417   |
| w[1118] x Actin-GS-255B<br>Cohort 1 (35 days) | M   | 0μM                              | 120 | 36 (10)  | 38     | 45  |          |            |          |
|                                               |     | 10μM                             | 104 | 36 (10)  | 38     | 45  | -0.58    | 0.00       | 0.8664   |
|                                               |     | 100μM                            | 101 | 36 (10)  | 38     | 45  | -0.56    | 0.00       | 0.8208   |
| <b>Control Strain (Paraquat)</b>              |     |                                  |     |          |        |     |          |            |          |
| w[1118] x Actin-GS-255B<br>Cohort 1 (3 days)  | F   | 0μM                              | 56  | 61 (15)  | 64     | 80  |          |            |          |
|                                               |     | 1μM                              | 58  | 61 (15)  | 64     | 80  | 0.21     | 0.00       | 0.8322   |
|                                               |     | 10μM                             | 59  | 61 (15)  | 64     | 80  | 0.21     | 0.00       | 0.8310   |
| w[1118] x Actin-GS-255B<br>Cohort 2 (3 days)  | F   | 0μM                              | 59  | 109 (10) | 112    | 120 |          |            |          |
|                                               |     | 1μM                              | 59  | 110 (9)  | 112    | 120 | 1.70     | 0.00       | 0.1904   |
|                                               |     | 10μM                             | 60  | 108 (12) | 112    | 120 | 1.03     | 0.00       | 0.6271   |
| w[1118] x Actin-GS-255B<br>Cohort 1 (3 days)  | M   | 0μM                              | 59  | 79 (18)  | 80     | 96  |          |            |          |
|                                               |     | 1μM                              | 60  | 81 (20)  | 88     | 104 | 2.75     | 9.09       | 0.0112   |
|                                               |     | 10μM                             | 58  | 84 (17)  | 88     | 104 | 6.12     | 9.09       | 0.0005   |
| w[1118] x Actin-GS-255B<br>Cohort 2 (3 days)  | M   | 0μM                              | 60  | 104 (8)  | 104    | 112 |          |            |          |
|                                               |     | 1μM                              | 59  | 108 (17) | 112    | 120 | 3.49     | 7.14       | 0.0000   |
|                                               |     | 10μM                             | 60  | 108 (9)  | 112    | 112 | 3.60     | 7.12       | 2.94E-6  |
| w[1118] x Actin-GS-255B<br>Cohort 1 (35 days) | F   | 0μM                              | 107 | 30 (15)  | 34     | 50  |          |            |          |
|                                               |     | 1μM                              | 100 | 30 (15)  | 34     | 50  | 0.04     | 0.00       | 0.9604   |
|                                               |     | 10μM                             | 100 | 29 (15)  | 34     | 50  | -1.38    | 0.00       | 0.6229   |
| w[1118] x Actin-GS-255B<br>Cohort 2 (35 days) | F   | 0μM                              | 110 | 29 (15)  | 30     | 48  |          |            |          |
|                                               |     | 1μM                              | 101 | 27 (14)  | 30     | 48  | 1.16     | 0.00       | 0.5875   |
|                                               |     | 10μM                             | 100 | 29 (15)  | 30     | 48  | -0.72    | 0.00       | 0.7436   |
| w[1118] x Actin-GS-255B<br>Cohort 1 (35 days) | M   | 0μM                              | 123 | 26 (11)  | 27     | 38  |          |            |          |
|                                               |     | 1μM                              | 100 | 26 (11)  | 27     | 38  | 0.02     | 0.00       | 0.9880   |
|                                               |     | 10μM                             | 101 | 28 (10)  | 27     | 38  | 1.14     | 0.00       | 0.5562   |
| w[1118] x Actin-GS-255B<br>Cohort 2 (35 days) | M   | 0μM                              | 117 | 26 (11)  | 28     | 36  |          |            |          |
|                                               |     | 1μM                              | 101 | 25 (11)  | 28     | 35  | -0.58    | 0.00       | 0.6547   |
|                                               |     | 10μM                             | 100 | 26 (11)  | 28     | 36  | 0.68     | 0.00       | 0.8708   |

**Table S2, Relates to Figure 2 and S3. Presence or Absence of RU486 during adaptation statistical summary**

| Genotype                                  | Sex | RU486 | pretreated | N   | Mean(SD) | Median | 90% | Δ Mean % | Δ Median % | (p)      |
|-------------------------------------------|-----|-------|------------|-----|----------|--------|-----|----------|------------|----------|
| <b>Control Strain (Hydrogen Peroxide)</b> |     |       |            |     |          |        |     |          |            |          |
| w[1118] x Actin-GS-255B Cohort 1          | F   | No    | No         | 120 | 54 (13)  | 56     | 72  |          |            |          |
|                                           |     |       | Yes        | 120 | 60 (11)  | 64     | 72  | 5.88     | 8.5        | 0.0210   |
| w[1118] x Actin-GS-255B Cohort 1          | M   | No    | No         | 140 | 50 (7)   | 48     | 56  |          |            |          |
|                                           |     |       | Yes        | 140 | 50 (9)   | 48     | 56  | -0.05    | 0.00       | 0.6532   |
| w[1118] x Actin-GS-255B Cohort 1          | F   | Yes   | No         | 119 | 58 (14)  | 56     | 80  |          |            |          |
|                                           |     |       | Yes        | 140 | 66 (13)  | 64     | 80  | 10.2     | 9.0        | 0.0101   |
| w[1118] x Actin-GS-255B Cohort 1          | M   | Yes   | No         | 100 | 50 (7)   | 48     | 56  |          |            |          |
|                                           |     |       | Yes        | 98  | 45 (9)   | 44     | 56  | -11.6    | -8.01      | 0.0117   |
| w[1118 x Actin-GS-255B Cohort 2           | F   | No    | No         | 176 | 56 (13)  | 56     | 72  |          |            |          |
|                                           |     |       | Yes        | 178 | 64 (11)  | 64     | 80  | 12.9     | 12.5       | 6.18E-06 |
| w[1118 x Actin-GS-255B Cohort 2           | M   | No    | No         | 101 | 51 (8)   | 50     | 58  |          |            |          |
|                                           |     |       | Yes        | 103 | 51 (11)  | 50     | 58  | -0.34    | 0.00       | 0.7475   |
| w[1118 x Actin-GS-255B Cohort 2           | F   | Yes   | No         | 140 | 51 (14)  | 48     | 72  |          |            |          |
|                                           |     |       | Yes        | 138 | 59 (11)  | 56     | 80  | 13.5     | 14.2       | 0.0036   |
| w[1118 x Actin-GS-255B Cohort 2           | M   | Yes   | No         | 120 | 51 (6)   | 50     | 60  |          |            |          |
|                                           |     |       | Yes        | 121 | 51 (10)  | 50     | 60  | -0.48    | 0.00       | 0.7897   |
| <b>Control Strain (Paraquat)</b>          |     |       |            |     |          |        |     |          |            |          |
| w[1118 x Actin-GS-255B Cohort 1           | F   | No    | No         | 159 | 111 (9)  | 112    | 120 |          |            |          |
|                                           |     |       | Yes        | 140 | 110 (9)  | 112    | 120 | 1.55     | 0.00       | 0.1415   |
| w[1118 x Actin-GS-255B Cohort 1           | M   | No    | No         | 117 | 71 (20)  | 72     | 88  |          |            |          |
|                                           |     |       | Yes        | 116 | 82 (22)  | 81     | 108 | 10.2     | 9.2        | 0.0028   |
| w[1118 x Actin-GS-255B Cohort 1           | F   | Yes   | No         | 162 | 111 (11) | 112    | 120 |          |            |          |
|                                           |     |       | Yes        | 178 | 111 (11) | 112    | 120 | -0.27    | 0.00       | 0.5791   |
| w[1118 x Actin-GS-255B Cohort 1           | M   | Yes   | No         | 120 | 78 (26)  | 80     | 104 |          |            |          |
|                                           |     |       | Yes        | 118 | 88 (17)  | 96     | 112 | 10.3     | 16.7       | 0.0022   |
| w[1118 x Actin-GS-255B Cohort 2           | F   | No    | No         | 119 | 88 (20)  | 80     | 120 |          |            |          |
|                                           |     |       | Yes        | 118 | 90 (21)  | 80     | 128 | 1.50     | 0.00       | 0.6704   |
| w[1118 x Actin-GS-255B Cohort 2           | M   | No    | No         | 120 | 77 (21)  | 80     | 104 |          |            |          |
|                                           |     |       | Yes        | 120 | 84 (19)  | 89     | 104 | 6.11     | 9.10       | 0.0046   |
| w[1118 x Actin-GS-255B Cohort 2           | F   | Yes   | No         | 198 | 87 (15)  | 88     | 111 |          |            |          |
|                                           |     |       | Yes        | 204 | 87 (15)  | 88     | 112 | 0.21     | 0.00       | 0.9123   |
| w[1118 x Actin-GS-255B Cohort 2           | M   | Yes   | No         | 117 | 76 (23)  | 80     | 96  |          |            |          |
|                                           |     |       | Yes        | 118 | 91 (21)  | 96     | 106 | 12.1     | 10.7       | 0.0002   |



**Table S3, Relates to Figure 2. Hydrogen peroxide adaptation  
Lon RNAi strains statistical summary**

| Genotype                           | Sex | RU486 | Pretreated | N   | Mean(SD) | Median | 90% | Δ Mean % | Δ Median % | (p)      |
|------------------------------------|-----|-------|------------|-----|----------|--------|-----|----------|------------|----------|
| Lon R1 x Actin-GS-255B<br>Cohort 1 | F   | No    | No         | 178 | 60 (13)  | 59     | 72  |          |            |          |
|                                    |     |       | Yes        | 194 | 71 (13)  | 72     | 88  | 12.2     | 10.1       | 2.34E-05 |
| Lon R1 x Actin-GS-255B<br>Cohort 1 | M   | No    | No         | 199 | 76 (9)   | 80     | 88  |          |            |          |
|                                    |     |       | Yes        | 176 | 75 (9)   | 72     | 88  | -2.97    | -11.1      | 0.2419   |
| Lon R1 x Actin-GS-255B<br>Cohort 1 | F   | Yes   | No         | 159 | 60 (10)  | 64     | 72  |          |            |          |
|                                    |     |       | Yes        | 162 | 60 (12)  | 64     | 72  | -0.49    | 0.00       | 0.5300   |
| Lon R1 x Actin-GS-255B<br>Cohort 1 | M   | Yes   | No         | 136 | 78 (9)   | 80     | 88  |          |            |          |
|                                    |     |       | Yes        | 158 | 76 (9)   | 72     | 88  | -3.10    | -10.0      | 0.1987   |
| Lon R2 x Actin-GS-255B<br>Cohort 1 | F   | No    | No         | 159 | 65 (17)  | 64     | 88  |          |            |          |
|                                    |     |       | Yes        | 166 | 77 (18)  | 88     | 96  | 13.3     | 15.7       | 2.21E-10 |
| Lon R2 x Actin-GS-255B<br>Cohort 1 | M   | No    | No         | 195 | 63 (12)  | 64     | 80  |          |            |          |
|                                    |     |       | Yes        | 165 | 63 (12)  | 64     | 80  | -0.84    | 0.00       | 0.8069   |
| Lon R2 x Actin-GS-255B<br>Cohort 1 | F   | Yes   | No         | 118 | 59 (14)  | 60     | 80  |          |            |          |
|                                    |     |       | Yes        | 100 | 60 (14)  | 60     | 80  | -3.41    | 0.00       | 0.5603   |
| Lon R2 x Actin-GS-255B<br>Cohort 1 | M   | Yes   | No         | 179 | 75 (11)  | 76     | 88  |          |            |          |
|                                    |     |       | Yes        | 178 | 74 (11)  | 72     | 88  | -1.41    | -5.56      | 0.3991   |
| Lon R1 x Actin-GS-255B<br>Cohort 2 | F   | No    | No         | 120 | 66 (15)  | 64     | 85  |          |            |          |
|                                    |     |       | Yes        | 118 | 77 (13)  | 80     | 96  | 14.3     | 20.0       | 6.88E-05 |
| Lon R1 x Actin-GS-255B<br>Cohort 2 | M   | No    | No         | 188 | 55 (5)   | 56     | 56  |          |            |          |
|                                    |     |       | Yes        | 196 | 52 (8)   | 56     | 56  | -4.42    | 0.00       | 0.1801   |
| Lon R1 x Actin-GS-255B<br>Cohort 2 | F   | Yes   | No         | 118 | 68 (11)  | 64     | 80  |          |            |          |
|                                    |     |       | Yes        | 119 | 65 (13)  | 64     | 80  | -3.77    | 0.00       | 0.5618   |
| Lon R1 x Actin-GS-255B<br>Cohort 2 | M   | Yes   | No         | 182 | 55 (8)   | 56     | 64  |          |            |          |
|                                    |     |       | Yes        | 186 | 56 (9)   | 56     | 64  | 2.55     | 0.00       | 0.3007   |
| Lon R2 x Actin-GS-255B<br>Cohort 2 | F   | No    | No         | 160 | 76 (11)  | 77     | 88  |          |            |          |
|                                    |     |       | Yes        | 159 | 81 (16)  | 80     | 96  | 5.91     | 3.21       | 0.0009   |
| Lon R2 x Actin-GS-255B<br>Cohort 2 | M   | No    | No         | 167 | 59 (10)  | 64     | 64  |          |            |          |
|                                    |     |       | Yes        | 158 | 61 (8)   | 64     | 67  | 3.34     | 0.00       | 0.3014   |
| Lon R2 x Actin-GS-255B<br>Cohort 2 | F   | Yes   | No         | 167 | 74 (14)  | 80     | 88  |          |            |          |
|                                    |     |       | Yes        | 159 | 74 (13)  | 80     | 88  | -0.31    | 0.00       | 0.9872   |
| Lon R2 x Actin-GS-255B<br>Cohort 2 | M   | Yes   | No         | 219 | 71 (8)   | 72     | 80  |          |            |          |
|                                    |     |       | Yes        | 216 | 70 (9)   | 64     | 80  | -2.63    | -12.5      | 0.2358   |

**Table S4, Relates to Figure 2 and S5. Hydrogen peroxide adaptation Lon OE strains statistical summary**

| Genotype                         | Sex | RU486 | pretreated | N   | Mean(SD) | Median | 90%  | Δ Mean % | Δ Median % | (p)      |
|----------------------------------|-----|-------|------------|-----|----------|--------|------|----------|------------|----------|
| Lon OE1 x Actin-GS-255B Cohort 1 | F   | No    | No         | 140 | 56 (9)   | 56     | 64   |          |            |          |
|                                  |     |       | Yes        | 155 | 57 (9)   | 56     | 68   | 1.82     | 0.00       | 0.7686   |
| Lon OE1 x Actin-GS-255B Cohort 1 | M   | No    | No         | 156 | 55 (6)   | 56     | 64   |          |            |          |
|                                  |     |       | Yes        | 158 | 55 (6)   | 56     | 64   | -0.72    | 0.00       | 0.7372   |
| Lon OE1 x Actin-GS-255B Cohort 1 | F   | Yes   | No         | 178 | 51 (7)   | 48     | 56   |          |            |          |
|                                  |     |       | Yes        | 185 | 58 (12)  | 56     | 72   | 12.5     | 14.3       | 3.02E-05 |
| Lon OE1 x Actin-GS-255B Cohort 1 | M   | Yes   | No         | 182 | 55 (5)   | 56     | 64   |          |            |          |
|                                  |     |       | Yes        | 176 | 55 (6)   | 56     | 64   | 0.90     | 0.00       | 0.8744   |
| Lon OE2 x Actin-GS-255B Cohort 1 | F   | No    | No         | 219 | 69 (21)  | 72     | 96   |          |            |          |
|                                  |     |       | Yes        | 180 | 72 (20)  | 72     | 96   | 5.84     | 0.00       | 0.1506   |
| Lon OE2 x Actin-GS-255B Cohort 1 | M   | No    | No         | 227 | 53 (12)  | 50     | 56   |          |            |          |
|                                  |     |       | Yes        | 229 | 50 (10)  | 50     | 56   | -7.89    | 0.00       | 0.1670   |
| Lon OE2 x Actin-GS-255B Cohort 1 | F   | Yes   | No         | 120 | 69 (15)  | 72     | 88   |          |            |          |
|                                  |     |       | Yes        | 123 | 74 (16)  | 72     | 96   | 5.55     | 6.00       | 0.0132   |
| Lon OE2 x Actin-GS-255B Cohort 1 | M   | Yes   | No         | 140 | 59 (12)  | 56     | 72   |          |            |          |
|                                  |     |       | Yes        | 142 | 59 (12)  | 64     | 72   | 2.20     | 12.5       | 0.5771   |
| Lon OE1 x Actin-GS-255B Cohort 2 | F   | No    | No         | 196 | 57 (17)  | 56     | 80   |          |            |          |
|                                  |     |       | Yes        | 199 | 64 (14)  | 64     | 80   | 11.3     | 12.5       | 0.0524   |
| Lon OE1 x Actin-GS-255B Cohort 2 | M   | No    | No         | 324 | 62 (9)   | 64     | 72   |          |            |          |
|                                  |     |       | Yes        | 318 | 61 (8)   | 64     | 72   | 2.42     | 0.00       | 0.2641   |
| Lon OE1 x Actin-GS-255B Cohort 2 | F   | Yes   | No         | 200 | 61 (13)  | 64     | 73   |          |            |          |
|                                  |     |       | Yes        | 198 | 74 (15)  | 72     | 96   | 18.1     | 11.1       | 2.20E-07 |
| Lon OE1 x Actin-GS-255B Cohort 2 | M   | Yes   | No         | 159 | 64 (10)  | 64     | 80   |          |            |          |
|                                  |     |       | Yes        | 160 | 64 (10)  | 64     | 80   | 0.95     | 0.00       | 0.6619   |
| Lon OE2 x Actin-GS-255B Cohort 2 | F   | No    | No         | 297 | 58 (16)  | 56     | 80   |          |            |          |
|                                  |     |       | Yes        | 302 | 58 (16)  | 56     | 80   | 0.04     | 0.00       | 0.8280   |
| Lon OE2 x Actin-GS-255B Cohort 2 | M   | No    | No         | 196 | 58 (14)  | 56     | 70   |          |            |          |
|                                  |     |       | Yes        | 176 | 54 (8.8) | 56     | 60.8 | -8.47    | 0.00       | 0.7800   |
| Lon OE2 x Actin-GS-255B Cohort 2 | F   | Yes   | No         | 299 | 62 (18)  | 58     | 88   |          |            |          |
|                                  |     |       | Yes        | 319 | 75 (15)  | 72     | 96   | 7.70     | 9.20       | 9.62E-12 |
| Lon OE2 x Actin-GS-255B Cohort 2 | M   | Yes   | No         | 300 | 52 (9)   | 56     | 64   |          |            |          |
|                                  |     |       | Yes        | 300 | 52 (8)   | 56     | 64   | 0.77     | 0.00       | 0.6221   |

**Table S5, Relates to Figure 5. Paraquat adaptation Lon RNAi strains statistical summary**

| Genotype                        | Sex | RU486 | Pretreated | N   | Mean(SD) | Median | 90% | Δ Mean % | Δ Median % | (p)    |
|---------------------------------|-----|-------|------------|-----|----------|--------|-----|----------|------------|--------|
| Lon R1 x Actin-GS-255B Cohort 1 | F   | No    | No         | 102 | 76 (19)  | 72     | 96  |          |            |        |
|                                 |     |       | Yes        | 99  | 79 (22)  | 72     | 106 | 3.92     | 0.00       | 0.3232 |
| Lon R1 x Actin-GS-255B Cohort 1 | M   | No    | No         | 139 | 73 (25)  | 80     | 104 |          |            |        |
|                                 |     |       | Yes        | 138 | 84 (21)  | 88     | 112 | 12.6     | 9.09       | 0.0265 |
| Lon R1 x Actin-GS-255B Cohort 1 | F   | Yes   | No         | 98  | 77 (23)  | 88     | 104 |          |            |        |
|                                 |     |       | Yes        | 101 | 76 (21)  | 72     | 96  | -2.40    | -16.2      | 0.4405 |
| Lon R1 x Actin-GS-255B Cohort 1 | M   | Yes   | No         | 118 | 83 (20)  | 80     | 107 |          |            |        |
|                                 |     |       | Yes        | 120 | 79 (22)  | 80     | 105 | -3.51    | 0.00       | 0.7139 |
| Lon R2 x Actin-GS-255B Cohort 1 | F   | No    | No         | 124 | 105 (23) | 112    | 120 |          |            |        |
|                                 |     |       | Yes        | 132 | 103 (25) | 112    | 120 | -2.38    | 0.00       | 0.8875 |
| Lon R2 x Actin-GS-255B Cohort 1 | M   | No    | No         | 163 | 77 (12)  | 80     | 88  |          |            |        |
|                                 |     |       | Yes        | 159 | 80 (11)  | 84     | 96  | 3.40     | 4.74       | 0.0335 |
| Lon R2 x Actin-GS-255B Cohort 1 | F   | Yes   | No         | 139 | 104 (21) | 112    | 120 |          |            |        |
|                                 |     |       | Yes        | 141 | 101 (18) | 104    | 120 | -2.98    | -7.69      | 0.0077 |
| Lon R2 x Actin-GS-255B Cohort 1 | M   | Yes   | No         | 142 | 72 (11)  | 72     | 88  |          |            |        |
|                                 |     |       | Yes        | 136 | 71 (11)  | 72     | 88  | -1.51    | 0.00       | 0.3928 |
| Lon R1 x Actin-GS-255B Cohort 2 | F   | No    | No         | 100 | 80 (22)  | 88     | 105 |          |            |        |
|                                 |     |       | Yes        | 102 | 83 (22)  | 88     | 112 | 4.04     | 0.00       | 0.4190 |
| Lon R1 x Actin-GS-255B Cohort 2 | M   | No    | No         | 120 | 73 (22)  | 72     | 97  |          |            |        |
|                                 |     |       | Yes        | 119 | 79 (22)  | 80     | 112 | 7.85     | 10.0       | 0.0216 |
| Lon R1 x Actin-GS-255B Cohort 2 | F   | Yes   | No         | 122 | 76 (23)  | 80     | 104 |          |            |        |
|                                 |     |       | Yes        | 100 | 75 (21)  | 72     | 104 | -1.71    | -10.0      | 0.6230 |
| Lon R1 x Actin-GS-255B Cohort 2 | M   | Yes   | No         | 120 | 73 (22)  | 76     | 104 |          |            |        |
|                                 |     |       | Yes        | 122 | 71 (25)  | 72     | 104 | -3.45    | -5.55      | 0.8536 |
| Lon R2 x Actin-GS-255B Cohort 2 | F   | No    | No         | 183 | 86 (19)  | 80     | 112 |          |            |        |
|                                 |     |       | Yes        | 156 | 83 (17)  | 80     | 112 | -3.78    | 0.00       | 0.1412 |
| Lon R2 x Actin-GS-255B Cohort 2 | M   | No    | No         | 160 | 102 (21) | 108    | 116 |          |            |        |
|                                 |     |       | Yes        | 173 | 110 (16) | 112    | 120 | 5.33     | 3.33       | 0.0026 |
| Lon R2 x Actin-GS-255B Cohort 2 | F   | Yes   | No         | 217 | 89 (19)  | 88     | 112 |          |            |        |
|                                 |     |       | Yes        | 192 | 87 (18)  | 80     | 108 | -2.61    | -10.0      | 0.3962 |
| Lon R2 x Actin-GS-255B Cohort 2 | M   | Yes   | No         | 196 | 111 (18) | 112    | 128 |          |            |        |
|                                 |     |       | Yes        | 183 | 109 (21) | 112    | 128 | -1.16    | 0.00       | 0.3933 |

**Table S6, Relates to Figure 3 and S6. Lifespan Statistical Summary**

| Genotype                         | Sex | RU486 | N   | Mean(SD) | Median | 90% | Δ Mean % | Δ Median % | (p)       |
|----------------------------------|-----|-------|-----|----------|--------|-----|----------|------------|-----------|
| w[1118] x Actin-GS-255B Cohort 1 | F   | -     | 96  | 81 (22)  | 85     | 99  |          |            |           |
|                                  |     | +     | 99  | 87 (17)  | 94     | 98  | 1.95     | 2.6        | 0.1400    |
| w[1118] x Actin-GS-255B Cohort 1 | M   | -     | 123 | 80 (11)  | 80     | 94  |          |            |           |
|                                  |     | +     | 114 | 82 (11)  | 80     | 94  | 1.62     | 0.00       | 0.4500    |
| LonR1 x Actin-GS-255B Cohort 1   | F   | -     | 97  | 90 (13)  | 92     | 106 |          |            |           |
|                                  |     | +     | 98  | 79 (9.4) | 80     | 84  | -12.2    | -13.0      | 5.11E-15  |
| LonR1 x Actin-GS-255B Cohort 1   | M   | -     | 118 | 80 (14)  | 82     | 95  |          |            |           |
|                                  |     | +     | 120 | 67 (10)  | 68     | 76  | -16.6    | -17.1      | 0.0000    |
| LonR2 x Actin-GS-255B Cohort 1   | F   | -     | 89  | 68 (23)  | 67     | 80  |          |            |           |
|                                  |     | +     | 87  | 65 (24)  | 64     | 74  | -3.60    | -5.00      | 0.0021    |
| LonR2 x Actin-GS-255B Cohort 1   | M   | -     | 116 | 74 (22)  | 74     | 90  |          |            |           |
|                                  |     | +     | 113 | 68 (20)  | 66     | 80  | -7.61    | -5.55      | 0.0003    |
| LonOE1 x Actin-GS-255B Cohort 1  | F   | -     | 91  | 79 (24)  | 72     | 96  |          |            |           |
|                                  |     | +     | 86  | 79 (24)  | 76     | 104 | 0.62     | 5.55       | 0.5178    |
| LonOE1 x Actin-GS-255B Cohort 1  | M   | -     | 121 | 62 (8.5) | 64     | 67  |          |            |           |
|                                  |     | +     | 122 | 59 (9.9) | 64     | 66  | -3.08    | 0.00       | 0.6949    |
| LonOE2 x Actin-GS-255B Cohort 1  | F   | -     | 83  | 92 (27)  | 92     | 103 |          |            |           |
|                                  |     | +     | 88  | 27 (18)  | 32     | 38  | -65.2    | -55.9      | 0.0000    |
| LonOE2 x Actin-GS-255B Cohort 1  | M   | -     | 106 | 72 (23)  | 74     | 86  |          |            |           |
|                                  |     | +     | 104 | 28 (9)   | 30     | 32  | -58.8    | -59.9      | 0.0000    |
| w[1118] x Actin-GS-255B Cohort 2 | F   | -     | 83  | 95 (27)  | 92     | 106 |          |            |           |
|                                  |     | +     | 79  | 95 (27)  | 92     | 105 | 0.721    | 0.00       | 0.5191    |
| w[1118] x Actin-GS-255B Cohort 2 | M   | -     | 121 | 80 (12)  | 82     | 92  |          |            |           |
|                                  |     | +     | 116 | 77 (12)  | 80     | 89  | -2.63    | -2.44      | 0.0990    |
| LonR1 x Actin-GS-255B Cohort 2   | F   | -     | 82  | 87 (16)  | 88     | 100 |          |            |           |
|                                  |     | +     | 95  | 80 (9.7) | 80     | 89  | -7.54    | -9.09      | 9.631E-9  |
| LonR1 x Actin-GS-255B Cohort 2   | M   | -     | 115 | 76 (16)  | 76     | 94  |          |            |           |
|                                  |     | +     | 114 | 71 (7.3) | 71     | 79  | -6.58    | -7.33      | 2.792E-10 |
| LonR2 x Actin-GS-255B Cohort 2   | F   | -     | 95  | 75 (22)  | 70     | 90  |          |            |           |
|                                  |     | +     | 89  | 67 (20)  | 62     | 76  | -10.3    | -11.1      | 0.0002    |
| LonR2 x Actin-GS-255B Cohort 2   | M   | -     | 106 | 88 (26)  | 88     | 96  |          |            |           |
|                                  |     | +     | 118 | 86 (25)  | 84     | 94  | -2.65    | -4.54      | 0.0129    |
| LonOE1 x Actin-GS-255B Cohort 2  | F   | -     | 95  | 62 (21)  | 66     | 83  |          |            |           |
|                                  |     | +     | 98  | 68 (13)  | 69     | 80  | 9.93     | 4.55       | 0.8078    |
| LonOE1 x Actin-GS-255B Cohort 2  | M   | -     | 98  | 59 (12)  | 59     | 66  |          |            |           |
|                                  |     | +     | 123 | 59 (9.6) | 60     | 66  | 0.26     | 1.69       | 0.8741    |
| LonOE2 x Actin-GS-255B Cohort 2  | F   | -     | 83  | 82 (24)  | 80     | 96  |          |            |           |
|                                  |     | +     | 94  | 27 (8.1) | 24     | 32  | -67.5    | -70        | 0.0000    |
| LonOE2 x Actin-GS-255B Cohort 2  | M   | -     | 92  | 92 (24)  | 92     | 100 |          |            |           |
|                                  |     | +     | 96  | 34 (11)  | 32     | 40  | -62.6    | -65.2      | 0.0000    |

**Table S7, Relates to Figure 7. Adaptation sex transformation statistical summary**

|                                        |                              | Sex                     | Pretreated | N        | Mean(SD) | Median | 90%   | Δ Mean % | Δ Median % | (p)      |
|----------------------------------------|------------------------------|-------------------------|------------|----------|----------|--------|-------|----------|------------|----------|
| TraF x Actin-GS-255B (Development)     | Cohort 1 (Hydrogen Peroxide) | Pseudo-female +2X RU486 | No         | 160      | 52 (14)  | 49     | 72    |          |            |          |
|                                        |                              |                         | Yes        | 200      | 56 (13)  | 56     | 72    | 7.75     | 14.3       | 0.0333   |
|                                        |                              | Female +2X RU486        | No         | 597      | 63 (19)  | 64     | 88    |          |            |          |
|                                        |                              |                         | Yes        | 661      | 78 (21)  | 80     | 104   | 18.6     | 20.0       | 0.0000   |
|                                        |                              | Female -RU486           | No         | 640      | 81 (24)  | 84     | 112   |          |            |          |
|                                        |                              |                         | Yes        | 657      | 86 (24)  | 88     | 112   | 6.07     | 4.10       | 0.0006   |
|                                        | Male -RU486                  | No                      | 581        | 55 (14)  | 56       | 72     |       |          |            |          |
|                                        |                              | Yes                     | 602        | 55 (13)  | 56       | 72     | 1.33  | 0.00     | 0.9434     |          |
|                                        | Cohort 2 (Hydrogen Peroxide) | Pseudo-female +2x RU486 | No         | 464      | 50 (11)  | 48     | 64    |          |            |          |
|                                        |                              |                         | Yes        | 439      | 59 (13)  | 56     | 72    | 14.2     | 15.4       | 0.0002   |
|                                        |                              | Female +2x RU486        | No         | 620      | 65 (20)  | 64     | 88    |          |            |          |
|                                        |                              |                         | Yes        | 458      | 77 (17)  | 80     | 96    | 16.0     | 15.7       | 2.98E-11 |
|                                        |                              | Female -RU486           | No         | 191      | 64 (16)  | 64     | 80    |          |            |          |
|                                        |                              |                         | Yes        | 201      | 76 (18)  | 80     | 96    | 17.0     | 15.4       | 5.38E-11 |
|                                        | Male -RU486                  | No                      | 191        | 44 (11)  | 40       | 56     |       |          |            |          |
|                                        |                              | Yes                     | 198        | 45 (12)  | 40       | 56     | 2.07  | 0.00     | 0.5557     |          |
|                                        | Cohort 1 (Paraquat)          | Pseudo-female +2X RU486 | No         | 80       | 42 (28)  | 44     | 88    |          |            |          |
|                                        |                              |                         | Yes        | 82       | 43 (26)  | 44     | 88    | -2.82    | 0.00       | 0.4070   |
|                                        |                              | Female +2X RU486        | No         | 108      | 95 (23)  | 101    | 128   |          |            |          |
|                                        |                              |                         | Yes        | 106      | 94 (24)  | 100    | 127   | -0.62    | -0.23      | 0.6511   |
| Female -RU486                          |                              | No                      | 148        | 104 (27) | 106      | 134    |       |          |            |          |
|                                        |                              | Yes                     | 153        | 102 (24) | 106      | 130    | -1.03 | 0.00     | 0.3961     |          |
| Male -RU486                            | No                           | 118                     | 68 (27)    | 73       | 105      |        |       |          |            |          |
|                                        | Yes                          | 120                     | 88 (26)    | 97       | 130      | 11.1   | 13.3  | 6.75E-08 |            |          |
| Cohort 2 (Paraquat)                    | Pseudo-female +2X RU486      | No                      | 142        | 64 (29)  | 68       | 115    |       |          |            |          |
|                                        |                              | Yes                     | 126        | 62 (24)  | 68       | 115    | -2.97 | 0.00     | 0.1683     |          |
|                                        | Female +2X RU486             | No                      | 207        | 104 (28) | 106      | 140    |       |          |            |          |
|                                        |                              | Yes                     | 231        | 97 (28)  | 100      | 136    | -1.91 | -5.67    | 0.1797     |          |
|                                        | Female -RU486                | No                      | 158        | 95 (23)  | 101      | 130    |       |          |            |          |
|                                        |                              | Yes                     | 162        | 95 (24)  | 102      | 130    | 0.62  | 0.00     | 0.6299     |          |
| Male -RU486                            | No                           | 140                     | 75 (27)    | 78       | 105      |        |       |          |            |          |
|                                        | Yes                          | 137                     | 86 (21)    | 88       | 120      | 10.9   | 9.81  | 5.31E-09 |            |          |
| TraF x Actin-GS-255B (Adult)           | Cohort 1 (Hydrogen Peroxide) | Male +2X RU486          | No         | 104      | 30 (13)  | 29     | 48    |          |            |          |
|                                        |                              |                         | Yes        | 110      | 35 (12)  | 35     | 54    | 4.65     | 5.14       | 0.0271   |
|                                        |                              | Female +2X RU486        | No         | 158      | 55 (16)  | 57     | 74    |          |            |          |
|                                        |                              |                         | Yes        | 161      | 65 (18)  | 66     | 85    | 8.36     | 9.76       | 0.0027   |
|                                        |                              | Female -RU486           | No         | 138      | 55 (20)  | 53     | 73    |          |            |          |
|                                        |                              |                         | Yes        | 165      | 64 (19)  | 65     | 87    | 8.41     | 9.38       | 0.0024   |
|                                        | Male -RU486                  | No                      | 112        | 33 (9)   | 31       | 47     |       |          |            |          |
|                                        |                              | Yes                     | 116        | 33 (9)   | 31       | 47     | 0.29  | 0.00     | 0.9294     |          |
|                                        | Cohort 2 (Hydrogen Peroxide) | Male +2X RU486          | No         | 109      | 27 (12)  | 26     | 35    |          |            |          |
|                                        |                              |                         | Yes        | 106      | 33 (11)  | 32     | 45    | 5.53     | 5.98       | 0.0163   |
|                                        |                              | Female +2X RU486        | No         | 119      | 53 (16)  | 53     | 75    |          |            |          |
|                                        |                              |                         | Yes        | 162      | 65 (15)  | 67     | 85    | 11.49    | 12.51      | 6.17E-05 |
| Female -RU486                          |                              | No                      | 161        | 56 (18)  | 57       | 77     |       |          |            |          |
|                                        |                              | Yes                     | 155        | 75 (16)  | 78       | 100    | 15.62 | 16.09    | 7.80E-07   |          |
| Male -RU486                            | No                           | 130                     | 35 (9)     | 37       | 48       |        |       |          |            |          |
|                                        | Yes                          | 134                     | 35 (8)     | 37       | 48       | 1.06   | 0.00  | 0.8360   |            |          |
| Tra RNAi x Actin-GS-255B (Development) | Cohort 1 (Hydrogen Peroxide) | Female -RU486           | No         | 178      | 81 (18)  | 88     | 102   |          |            |          |
|                                        |                              |                         | Yes        | 183      | 95 (19)  | 96     | 116   | 11.9     | 7.13       | 0.0017   |
|                                        |                              | Pseudo Male +2X RU486   | No         | 103      | 70 (19)  | 71     | 87    |          |            |          |
|                                        |                              |                         | Yes        | 116      | 70 (17)  | 71     | 90    | 0.52     | 0.00       | 0.2964   |
|                                        |                              | Male -RU486             | No         | 127      | 75 (15)  | 78     | 95    |          |            |          |
|                                        |                              |                         | Yes        | 138      | 75 (14)  | 78     | 96    | 0.13     | 0.00       | 0.6883   |
|                                        | Male +2X RU486               | No                      | 101        | 70 (17)  | 72       | 85     |       |          |            |          |
|                                        |                              | Yes                     | 109        | 71 (17)  | 74       | 85     | 1.06  | 1.47     | 0.4039     |          |
|                                        | Cohort 2 (Hydrogen Peroxide) | Female -RU486           | No         | 160      | 60 (19)  | 60     | 80    |          |            |          |
|                                        |                              |                         | Yes        | 179      | 70 (17)  | 74     | 93    | 8.93     | 13.09      | 2.57E-09 |
|                                        |                              | Pseudo Male +2X RU486   | No         | 97       | 66 (20)  | 68     | 79    |          |            |          |
|                                        |                              |                         | Yes        | 99       | 67 (18)  | 68     | 84    | 1.58     | 0.00       | 0.2319   |
|                                        |                              | Male -RU486             | No         | 96       | 63 (14)  | 64     | 80    |          |            |          |
|                                        |                              |                         | Yes        | 98       | 64 (14)  | 64     | 80    | -1.35    | 0.00       | 0.6187   |
| Male +2X RU486                         |                              | No                      | 95         | 57 (20)  | 60       | 75     |       |          |            |          |
|                                        |                              | Yes                     | 100        | 57 (18)  | 60       | 75     | 0.43  | 0.00     | 0.8755     |          |

## Supplemental Experimental Procedures

### Drosophila Strains and Culture

Flies were cultured on standard agar/dextrose/corn meal/yeast media at 25°C as previously described [S1]. Lon RNAi strains were obtained from Bloomington Drosophila Stock Center, *y[1] sc[\*] v[1]; P{y[+t7.7] v[+t1.8]=TRiP.HMS01060}cinattP2* (abbreviated Lon R1 RNAi), and the Vienna Drosophila RNAi Center, *w[1118]; P{GD14030}v36035* (abbreviated Lon R2 RNAi). Lon Over-expression were purchased from Bloomington Drosophila Stock Center, *y[1] w[\*]; P{w[+mC]=EP}Lon[G3998]* (abbreviated Lon OE1), and the Drosophila Genetic Resource Center, *w[\*]; P{w[+mC]=GSV2}Lon[GS5186]/TM3, Sb[1] Ser[1]* (abbreviated Lon OE2). Males from these lines (or *w[1118]* as a control) were crossed to virgin females of the Actin-Gene-Switch-255B (Actin-GS-255B) driver strain [S2]. Virgin male and female progeny were collected over 48 hours following eclosion. Adult flies were transferred to fresh media every other day. For changes in Lon gene expression, flies were maintained on media adjusted to final concentration of 160µg/ml mifepristone (RU486, no. M8046, Sigma-Aldrich) [S1], and transferred to fresh media every other day. Flies were incubated in vials for 10 days prior to adaptation experiments.

### Treatment with Hydrogen Peroxide and Paraquat

Pretreatment experiments consisted of flies exposed to only an adaptive dose of an oxidant and allowed to recover prior to collection, whereas adaptation experiments included an additional exposure to a semi-lethal dose of the oxidant and survival was recorded. Both pretreatment and adaptation experiments were conducted in the same manner as previously described [S3]. Briefly, for pretreatment, groups of 20 flies were transferred to vials containing a Kimwipe soaked in 1mL of 5% sucrose with various concentrations of hydrogen peroxide (no. H3410, Sigma-Aldrich) for 8 hours. Afterwards, flies were transferred to vials containing a Kimwipe soaked in 1mL of 5% sucrose for an additional 16 hours and then collected for downstream processing. For adaptation experiments, flies were transferred to vials containing a Kimwipe soaked in 1mL of 5% sucrose with various concentrations of hydrogen peroxide or methyl viologen dichloride (paraquat, no. 856177, Sigma-Aldrich) for 8 hours. Subsequently, flies were transferred to vials containing 5% sucrose for a 16 hour recovery. Afterwards, flies were transferred to vials containing a semi-lethal dose (4.4M hydrogen peroxide and 30mM paraquat). Flies were scored for survival every 8 hours until all flies had died.

### Western Blot

20 flies were collected for each treatment group and frozen. Tissue was re-suspended in 200µL of tissue protein extraction buffer (no. 78501, Thermo-Scientific), supplemented with protease inhibitors (no. 04693159001, Roche), and homogenized using an electric pestle. Afterwards, to maximize lysis, samples underwent a 'freeze-thaw' cycle, consisting of a 5min incubation on dry-ice followed with a 5min incubation in water, and then vortexed, and repeated 2 additional times. Samples were then centrifuged at 10,000g to remove cuticle fragments and unlysed cells. Protein content was quantified with the Bicinchoninic acid assay (BCA) reducing agent compatible kit (no. 23252, Thermo-Scientific). Protein samples were run on a 10% SDS-PAGE gel and transferred to a PVDF membrane. Custom rabbit polyclonal Lon antibody directed against the Drosophila Lon (CG8798) peptide at amino acids Asp613 to Ser838 (1:200 dilution) was generously provided by Dr. Laurie Kaguni [S4]. The goat polyclonal anti-Actin-HRP antibody, conjugated to horseradish peroxidase (1:1000 dilution, no. sc-1616, Santa Cruz Biotechnology) was used for all loading controls. Mouse tissue from 3 month old male and

female black C57Bl/6 purchased from Jackson labs was generously provided by Dr. Valter Longo. 20µg of protein, for each sex, were run on 10% SDS-PAGE gels and transferred as described above. Mouse Lon protein was detected using a commercially available rabbit polyclonal anti-Lon antibody (1:200 dilution) (no.1-81734, Novus Biologicals).

### **RNA Extraction and Quantitative RT-PCR**

Flies were collected in 500µL TRIzol (no. 15596-026, Life Technologies) and frozen. RNA extraction was performed following manufacturer's instructions with slight modification. Flies were homogenized in 500µL TRIzol, followed with the addition of 500µL TRIzol and incubated at room temperature for 5min. Samples were centrifuged at 12,000g for 10min at 4°C to remove cuticle fragments. Supernatant was decanted and 200µL of chloroform was added, and samples were vigorously shaken for 15 seconds, and then incubated at room temperature for 5min. Samples were centrifuged at 12,000g for 15min at 4°C. Aqueous phase was collected, and 500µL ice-cold 100% isopropanol was added, and samples were incubated at room temperature for 10min. Samples were centrifuged at 12,000g for 10min at 4°C, and RNA pellet was retained. To the RNA pellet, 1mL of ice-cold 70% ethanol was added, briefly vortexed, and centrifuged at 7,500g for 5min at 4°C. Pellet was dried and re-suspended in DEPC-treated water, and RNA concentration was assessed using a Nanodrop spectrophotometer (Thermo-Scientific).

RNA was reverse transcribed to cDNA using TaqMan® Reverse Transcription Reagents (no. N8080234, Life Technologies) and quantitative PCR was performed using iTaq SYBR Green (no. 1725120, Bio-Rad). Amplification for Lon was carried out with the primer sequences (Forward: 5' GAAGATAGTGGAGGTATCCA Reverse: 5' TGATGGCGAAGAGGAGCTTA). Primers for Rp49 were used as an internal control (Forward: 5'CGGATCGATATGCTAAGCTGT Reverse: 5' GCGCTTGTTTCGATCCGTA). The primer sequence used for glutathione S-transferase D1 (Forward: 5'GACTCCCTGTACCCTAAGTGC Reverse: 5'TCGGCTACGGTAAGGGAGTCA). To detect the two isoforms of Lon (Lon RC and Lon RA) primers were designed to uniquely detect these two exon variants using the following primer sequences (Lon RA Forward: 5'CCAGTCTCAGGTTCCACTATC Reverse: 5'CTAAGCCCGCTGAAGATCAAA Lon RC Forward: 5'TGACAACCTTTCGATTATCCTCT Reverse: 5'GACTCGACTTTGCCTGATTT). Primers were designed using the NCBI Primer-Blast software [S5].

### **Mitochondrial Isolation**

Mitochondrial isolation was conducted as previously described with slight modification [S6, S7]. Following pretreatment experiments, 200 flies were collected per replicate for each treatment group. Flies were transferred into homogenization buffer (0.32M sucrose, 10mM EDTA, 10mM Tris/HCl, 2% BSA) and gently pressed using pre-chilled mortar and pestle. Samples were then centrifuged at 200g for 3min to remove cuticle fragments. Lysate was then centrifuged for 10min at 2200g, supernatant was removed and the pellet was re-suspended in non-BSA containing homogenization buffer. Pellets were then lysed by passing through a 21 gauge needle, followed with 3 cycles of freeze-thaw and an additional centrifugation. Protein content was quantified using the BCA protein assay reducing agent compatible kit (Thermo-Scientific), 15µg of protein were used for the activity assay.

### **Substrate Preparation**

Protein substrates for activity assay, tritium-tagged aconitase and tritium-tagged oxidized-aconitase, were labeled as previously described [S8]. Briefly, 5mg of aconitase was dissolved in 0.1M Hepes buffer with the addition of 6.6uCi [H3]Formaldehyde and 20mM sodium cyanoborohydride. Mixture was incubated at room temperature on an end-over-end shaker for 1 hr. To one mixture, hydrogen peroxide was added at a final concentration of 5mM, and mixtures were rocked for an additional hour. Mixtures were dialyzed through a 10,000 MWCO filter (Millipore) at 15,000g for 30min, eluent was discarded, and slurry re-suspended in Hepes buffer. This was repeated for an additional 7 washes. Protein content was quantified with BCA assay kit (Thermo-Scientific).

### **Activity Assay**

Isolated mitochondrial lysate was incubated in the presence of 5µg of protein substrate, with ± 5mM ATP and 2mM MgCl<sub>2</sub>. Samples were incubated at 37°C on a tube shaker for 2 hrs. Afterwards, 10µL of 20% BSA and 20µL of Trichloroacetic Acid (TCA) was added to the sample and centrifuged at 14,000g for 10min to quench the reaction. Supernatant was transferred to 5mL of scintillation fluid, and counts were read and calculated as acid-soluble counts minus background counts on a liquid scintillation counter (Wallace 1410).

### **Lifespan Assays**

Lifespan assays were performed as previously described [S9]. Briefly, to generate age-synchronized cohorts of flies, virgin males and virgin females were collected from culture bottles over a 48 hour period following eclosion. The flies were maintained separately at 20 females per vial and 25 males per vial. Flies were transferred to fresh media every other day and deaths were recorded. The mean, median, percent change in the mean and median, and the log-rank p value were calculated using the R statistical software [S10].

### **RNA-sequencing Analysis**

The RNA-sequencing data used in this study is previously described in detail [S11]. Briefly, the raw RNA sequence data was processed by trimming the reads using Trimmomatic [S12] to remove any remaining adapters and low quality bases. The processed reads were then mapped to the Ensembl BDGP5.25 build of the *D. melanogaster* (downloaded from the Illumina iGenomes website) reference genome using Tophat2 (version 2.0.12) [S13]. The abundance of total reads were plotted over the *Lon* locus using IGV (version 2.3) [S14], for virgin females, mated females and mated males.

### **Mass Spectrometry**

200 flies were collected from 3 day old w<sup>[1118]</sup> x Actin-GS-255B males and females and used for immunoprecipitation with the custom *D. melanogaster* rabbit polyclonal anti-*Lon* antibody, as previously described [S15]. Samples were run on a 10% SDS-PAGE gel and bands were visualized with Coomassie Brilliant Blue. Bands were excised from gel and subjected to an in-gel trypsin digestion and subsequently dehydrated with acetonitrile before being prepared for LC-MS/MS analysis of fragments carried out by the USC Core Facility.

### **Sex Transformation**

To generate transformed flies (pseudo-females) *y-ac-w; UAS-Tra[F]/SM5,CyO* [S16] or pseudo-males, *y[1] v[1]; P{y[+t7.7] v[+t1.8]=TRiP.HMS02830}attP40* (abbreviated Tra RNAi) were used. Virgin females were mated to males of the Actin-GS-255B driver strain and allowed to mate for



2 days on standard media containing ethanol vehicle, 160µg/mL (1x), or 320µg/mL (2x) RU486 [S17]. Virgin progeny were collected over a 48 hour period following eclosion.

### **Gonadal Isolation**

Tissue was isolated as previously described [S18, S19]. Briefly, flies were fed yeast 1 day prior to extraction to increase ovary size. Ovaries, testes, and gonads were extracted from chromosomal females, chromosomal males, and pseudo-females. Following extraction, whole flies, carcasses, and reproductive organs were placed on ice. Tissue was prepared for western blot as described above.

### **Statistical Analysis**

Data was expressed as the mean with S.E.M. and p values were calculated using a two-tailed Student's t-test for pairwise comparisons. One-way analysis of variance (ANOVA) followed by Tukey's post-hoc test was used for multiple comparisons. Statistical analysis were performed using GraphPad Prism v.6 software. Survival curves were analyzed by the Kaplan-Meier procedure and log-rank test.

### **Supplemental References**

- S1. Ren, C., Finkel, S.E., and Tower, J. (2009). Conditional inhibition of autophagy genes in adult *Drosophila* impairs immunity without compromising longevity. *Exp Gerontol* 44, 228-235.
- S2. Ford, D., Hoe, N., Landis, G.N., Tozer, K., Luu, A., Bhole, D., Badrinath, A., and Tower, J. (2007). Alteration of *Drosophila* life span using conditional, tissue-specific expression of transgenes triggered by doxycycline or RU486/Mifepristone. *Exp Gerontol* 42, 483-497.
- S3. Pickering, A.M., Staab, T.A., Tower, J., Sieburth, D., and Davies, K.J.A. (2013). A conserved role for the 20S proteasome and Nrf2 transcription factor in oxidative stress adaptation in mammals, *Caenorhabditis elegans* and *Drosophila melanogaster*. *J Exp Biol* 216, 543-553.
- S4. Matsushima, Y., Goto, Y.-i., and Kaguni, L.S. (2010). Mitochondrial Lon protease regulates mitochondrial DNA copy number and transcription by selective degradation of mitochondrial transcription factor A (TFAM). *Proc Natl Acad Sci U S A* 107, 18410-18415.
- S5. Ye, J., Coulouris, G., Zaretskaya, I., Cutcutache, I., Rozen, S., and Madden, T.L. (2012). Primer-BLAST: a tool to design target-specific primers for polymerase chain reaction. *BMC Bioinformatics* 13, 134.
- S6. Sohal, R.S., Agarwal, A., Agarwal, S., and Orr, W.C. (1995). Simultaneous Overexpression of Copper- and Zinc-containing Superoxide Dismutase and Catalase Retards Age-related Oxidative Damage and Increases Metabolic Potential in *Drosophila melanogaster*. *J Biol Chem* 270, 15671-15674.
- S7. Miwa, S., St-Pierre, J., Partridge, L., and Brand, M.D. (2003). Superoxide and hydrogen peroxide production by *Drosophila* mitochondria. *Free Radic Biol Med* 35, 938-948.
- S8. Bota, D.A., and Davies, K.J. (2002). Lon protease preferentially degrades oxidized mitochondrial aconitase by an ATP-stimulated mechanism. *Nature Cell Biol* 4, 674-680.
- S9. Ren, C., Webster, P., Finkel, S.E., and Tower, J. (2007). Increased internal and external bacterial load during *Drosophila* aging without life-span trade-off. *Cell Metab* 6, 144-152.
- S10. R Development Core Team (2010). R: A language and environment for statistical computing. (Vienna, Austria: R Foundation for Statistical Computing).

- S11. Landis, G.N., Salomon, M.P., Keroles, D., Brookes, N., Sekimura, T., and Tower, J. (2015). The progesterone antagonist mifepristone/RU486 blocks the negative effect on life span caused by mating in female *Drosophila*. *Aging (Albany NY)* 7, 53.
- S12. Bolger, A.M., Lohse, M., and Usadel, B. (2014). Trimmomatic: a flexible trimmer for Illumina sequence data. *Bioinformatics*, btu170.
- S13. Kim, D., Pertea, G., Trapnell, C., Pimentel, H., Kelley, R., and Salzberg, S.L. (2013). TopHat2: accurate alignment of transcriptomes in the presence of insertions, deletions and gene fusions. *Genome Biol* 14, R36.
- S14. Thorvaldsdóttir, H., Robinson, J.T., and Mesirov, J.P. (2013). Integrative Genomics Viewer (IGV): high-performance genomics data visualization and exploration. *Brief Bioinform* 14, 178-192.
- S15. Beresford, G.W., and Boss, J.M. (2001). CIITA coordinates multiple histone acetylation modifications at the HLA-DRA promoter. *Nat Immunol* 2, 652-657.
- S16. Arbeitman, M.N., Fleming, A.A., Siegal, M.L., Null, B.H., and Baker, B.S. (2004). A genomic analysis of *Drosophila* somatic sexual differentiation and its regulation. *Development* 131, 2007-2021.
- S17. Shen, J., Curtis, C., Tavaré, S., and Tower, J. (2009). A screen of apoptosis and senescence regulatory genes for life span effects when over-expressed in *Drosophila*. *Aging (Albany NY)* 1, 191.
- S18. Wong, L.C., and Schedl, P. (2006). Dissection of *Drosophila* Ovaries. *J Vis Exp*, 52.
- S19. Zamore, P.D., and Ma, S. (2011). Isolation of *Drosophila melanogaster* Testes. *J Vis Exp*, 2641.
